# Supplementary material
Source: publisher figshare collection journal article supplement (https://frontiersin.figshare.com/ndownloader/files/14101661)

**Supplementary Figure 1A**

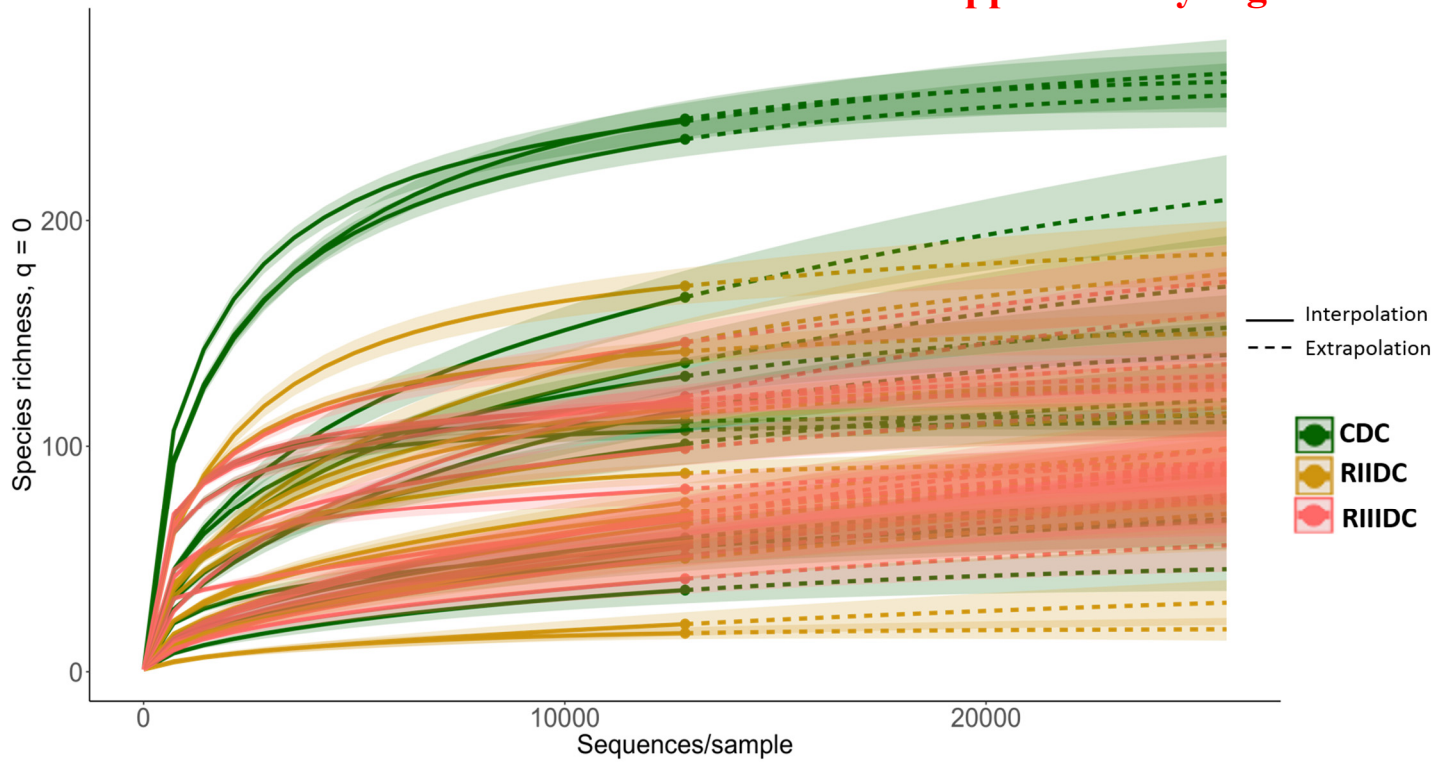

**Supplementary Figure 2A**

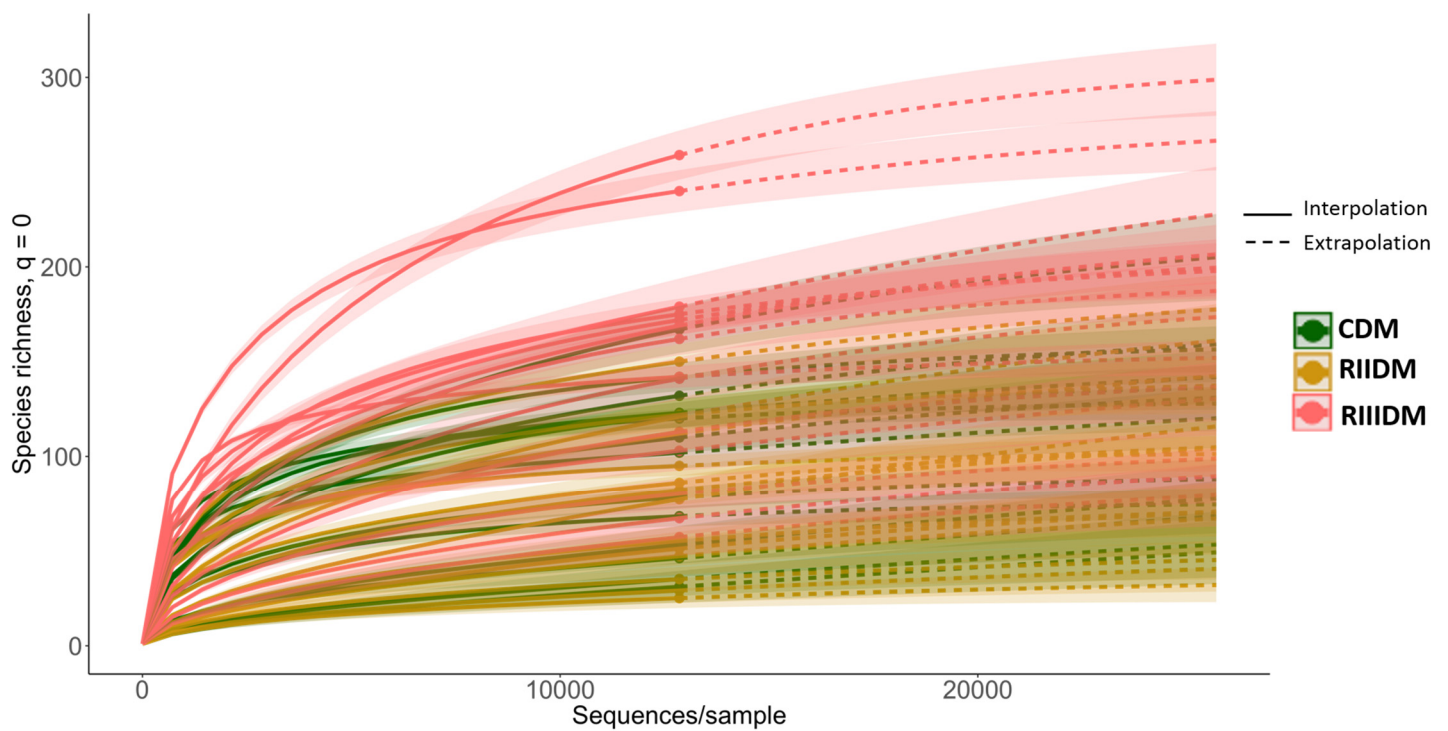

Supplementary Figure 2A

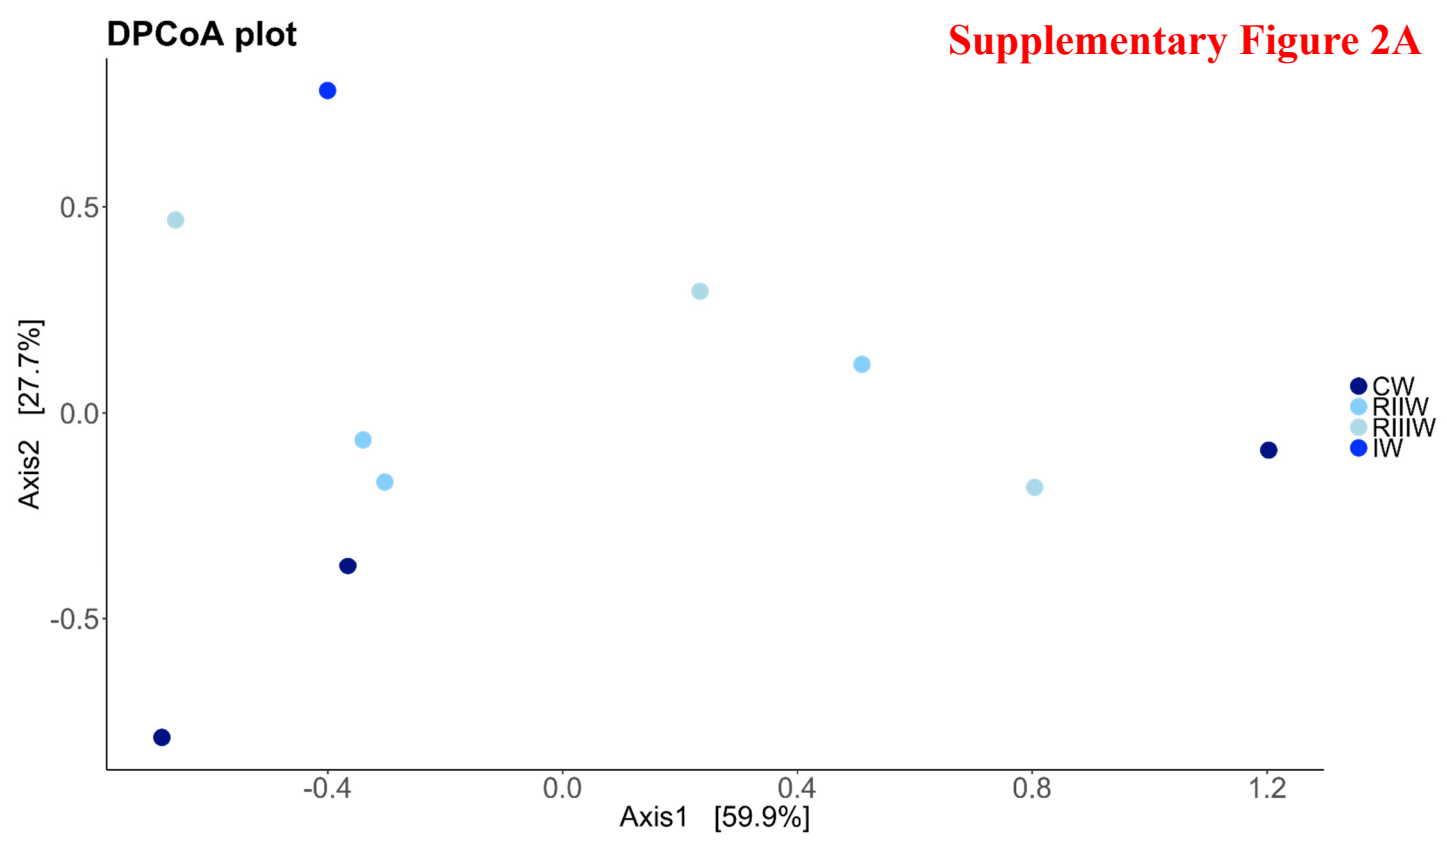

Supplementary Figure 2B

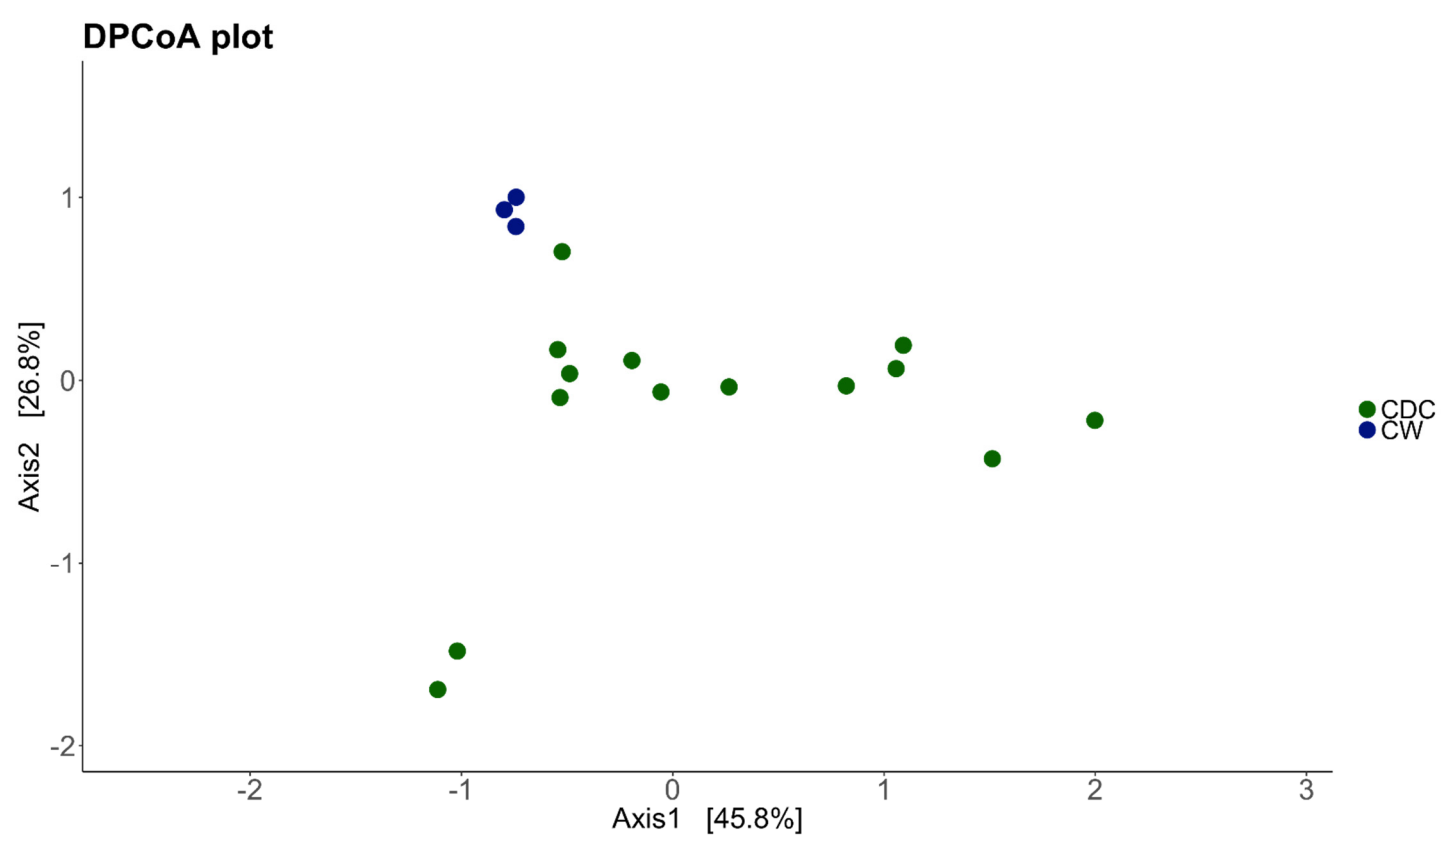

Supplementary Figure 2C

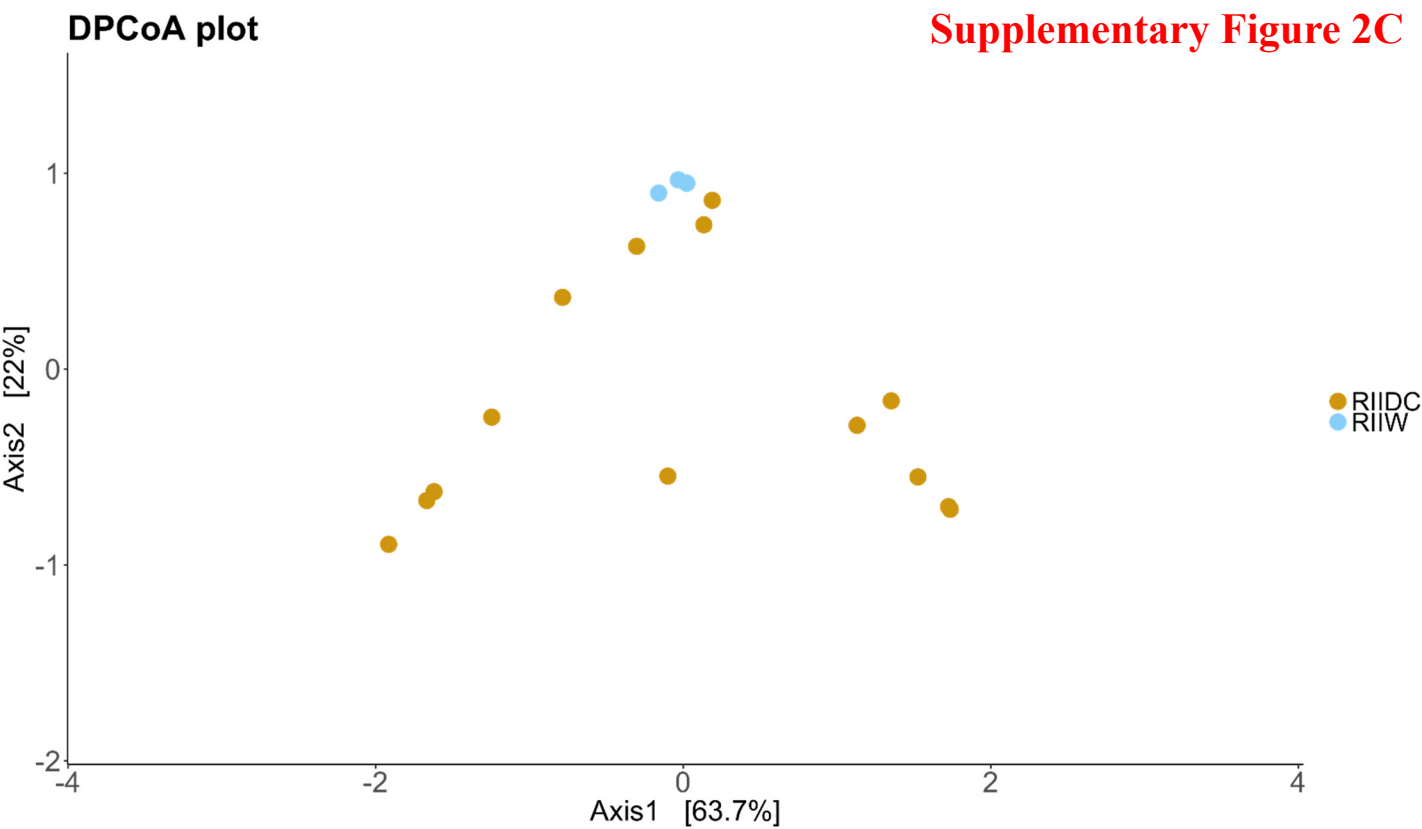

Supplementary Figure 2D

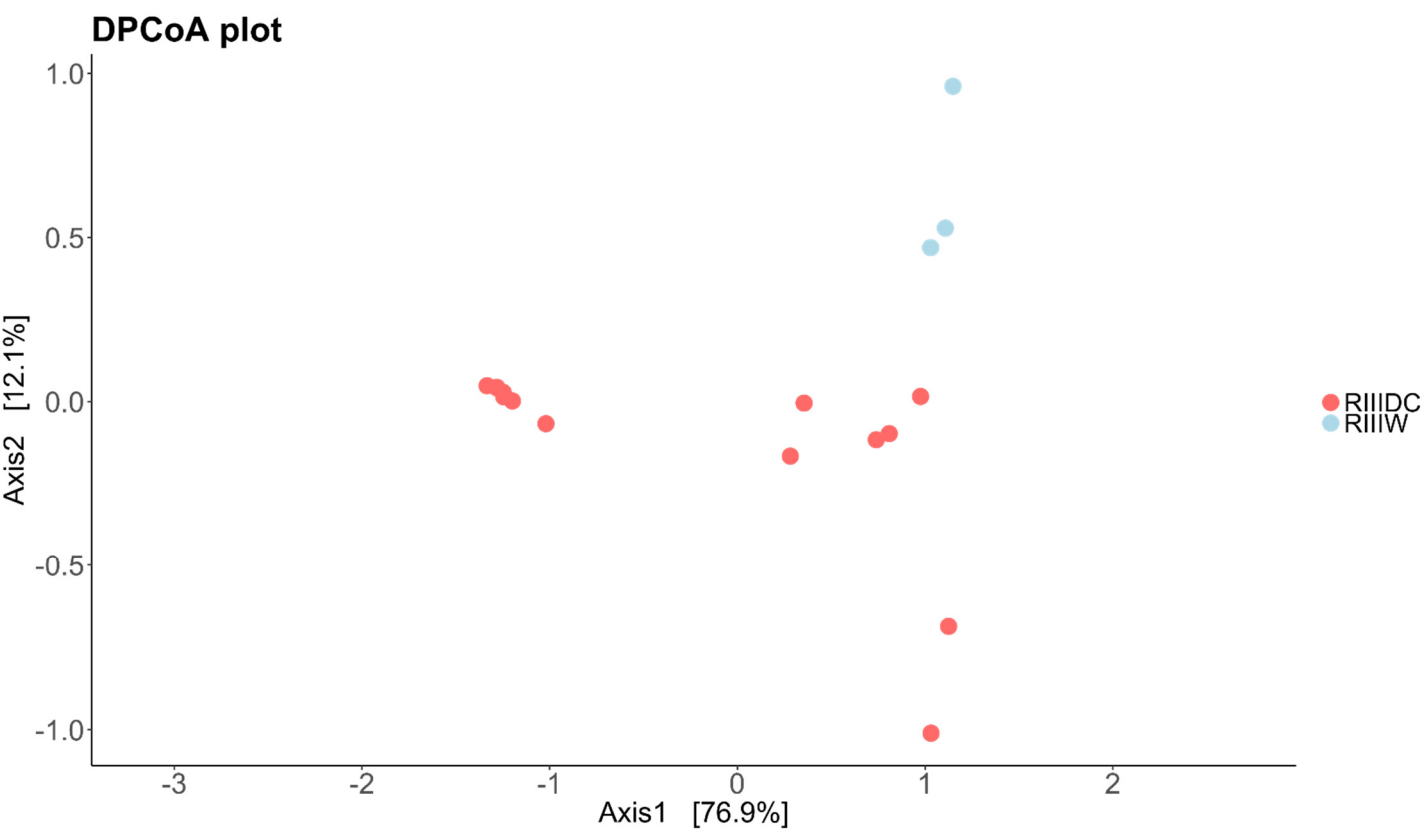

Supplementary Figure 2E

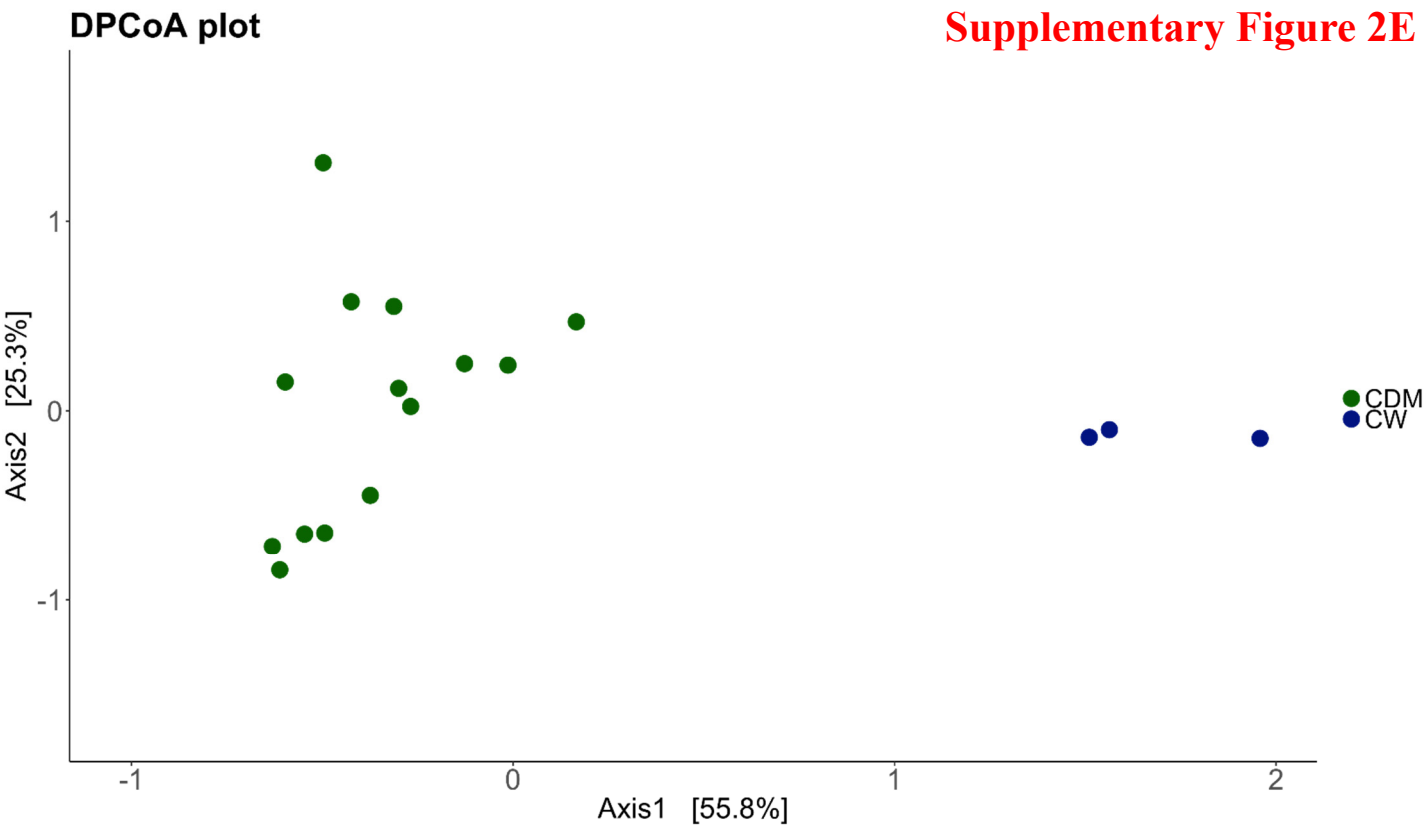

Supplementary Figure 2F

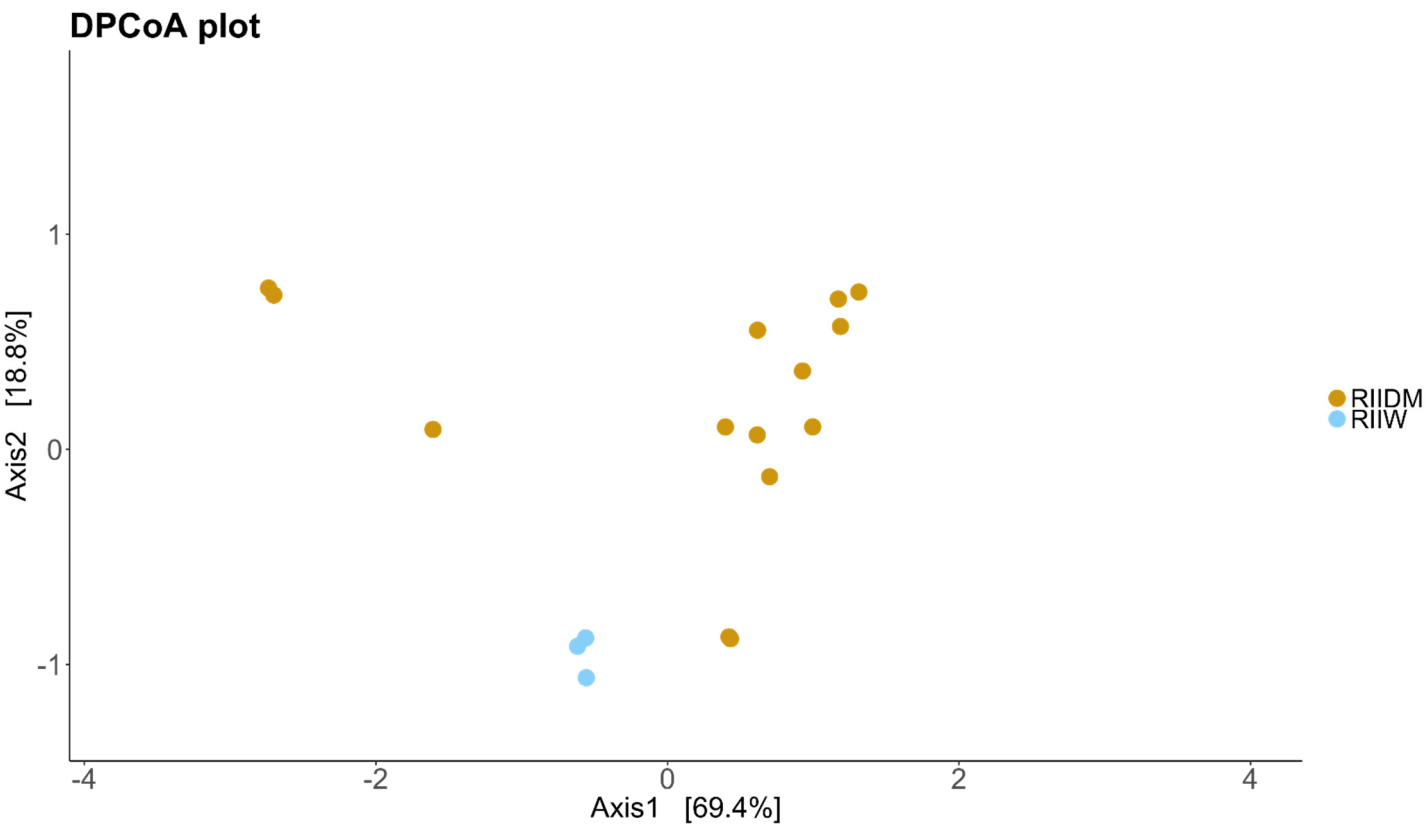



Supplementary Figure 2G

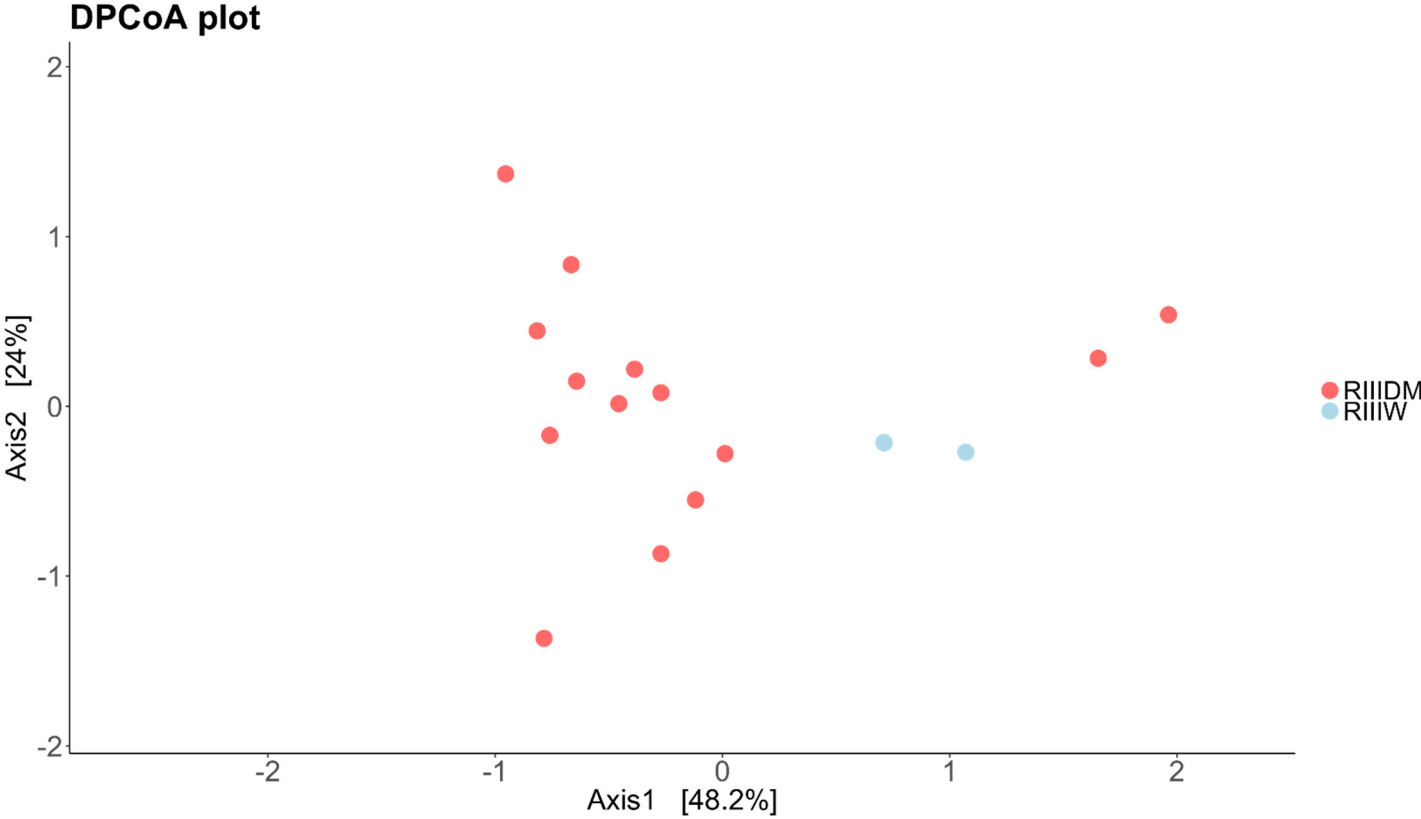

**Supplementary Figure 3A**

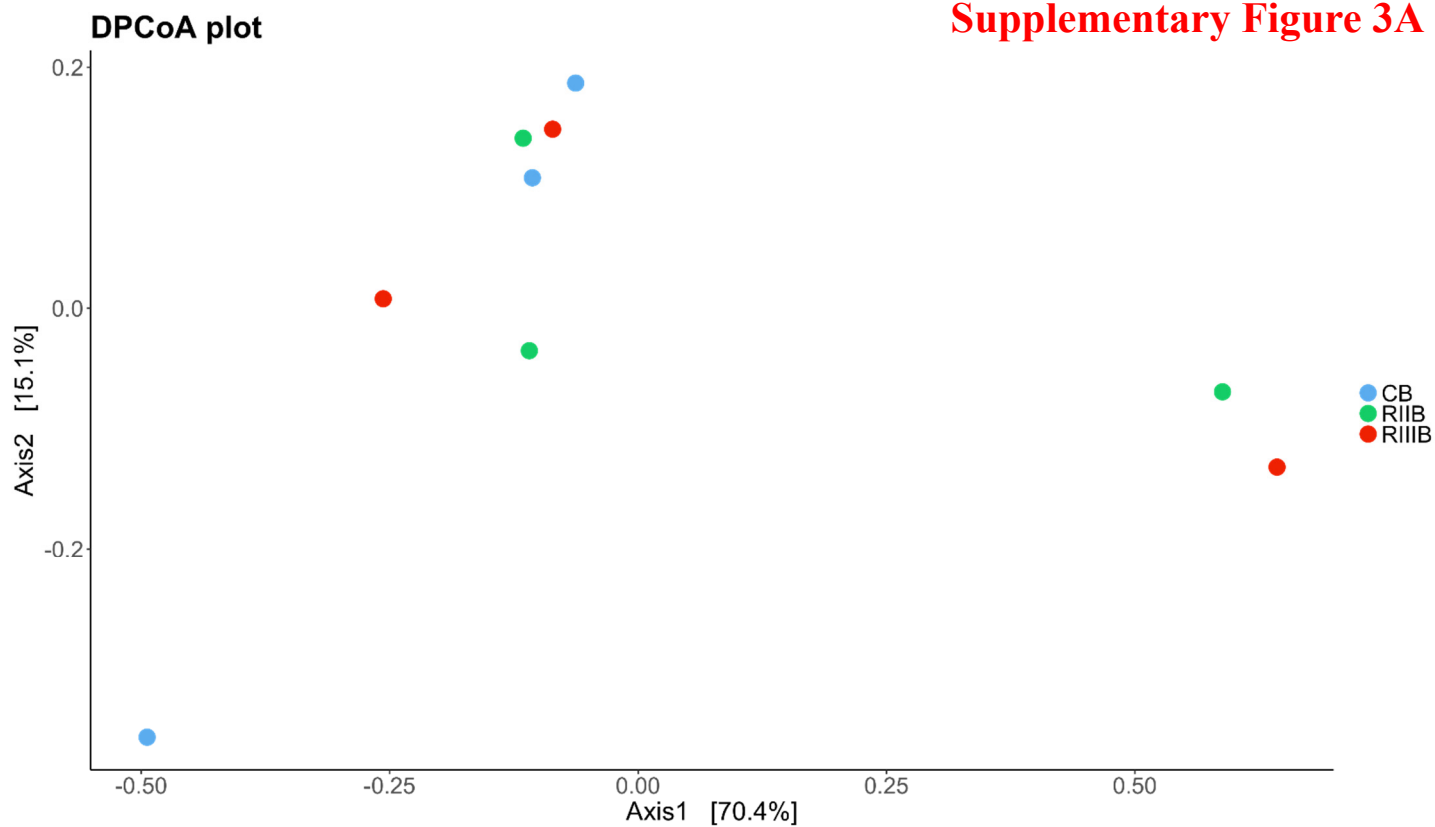

**Supplementary Figure 3B**

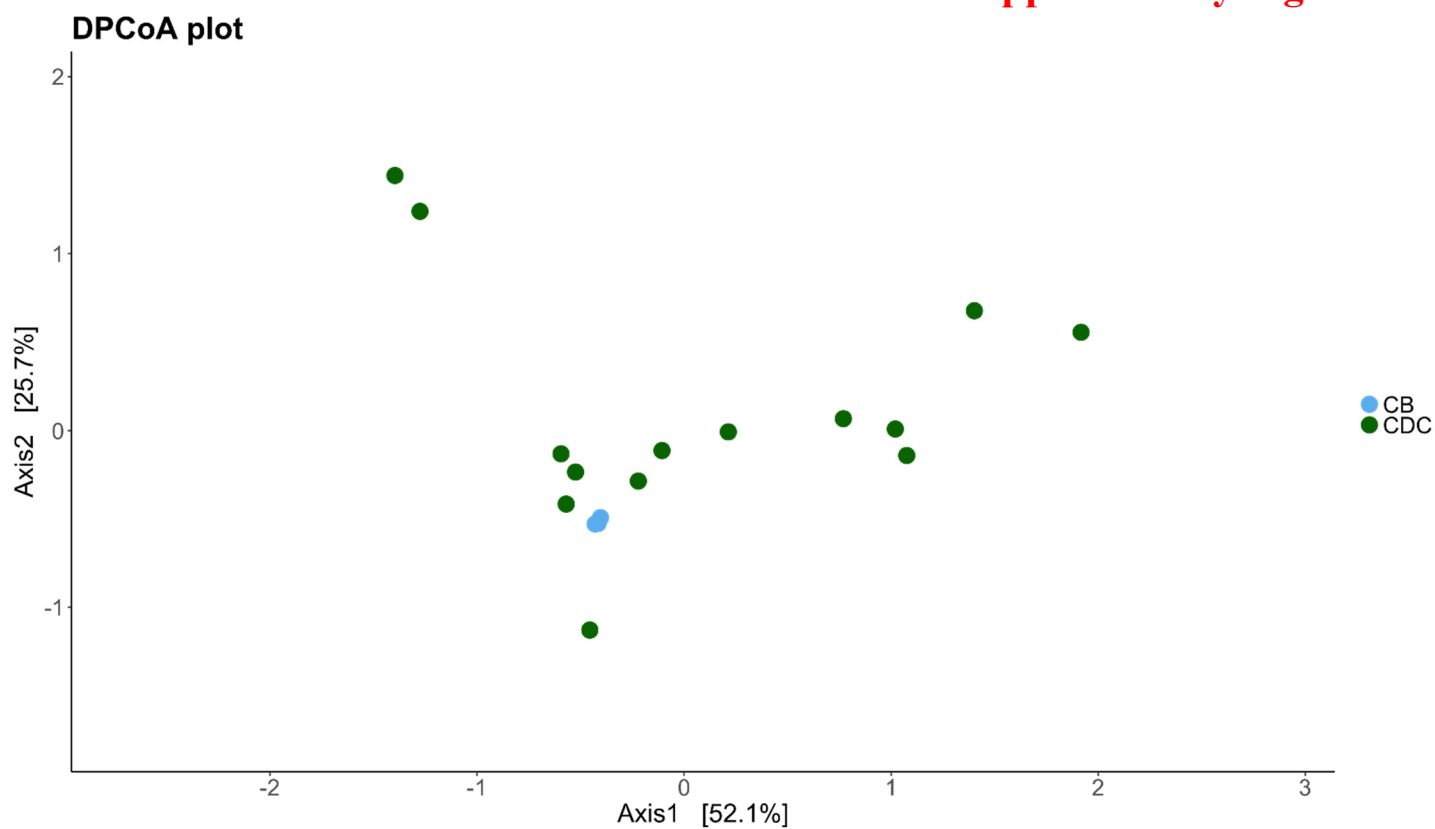

Supplementary Figure 3C

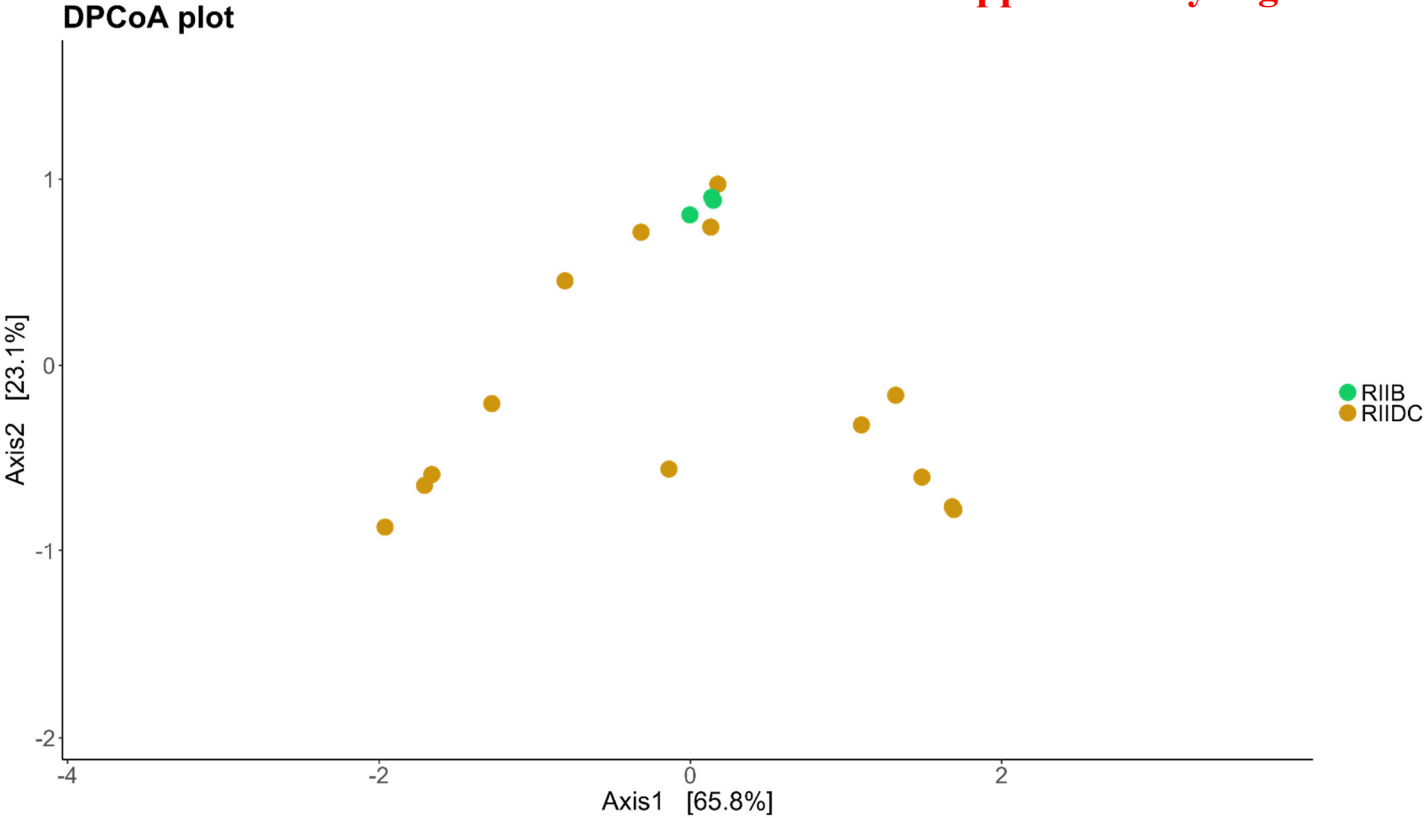

Supplementary Figure 3D

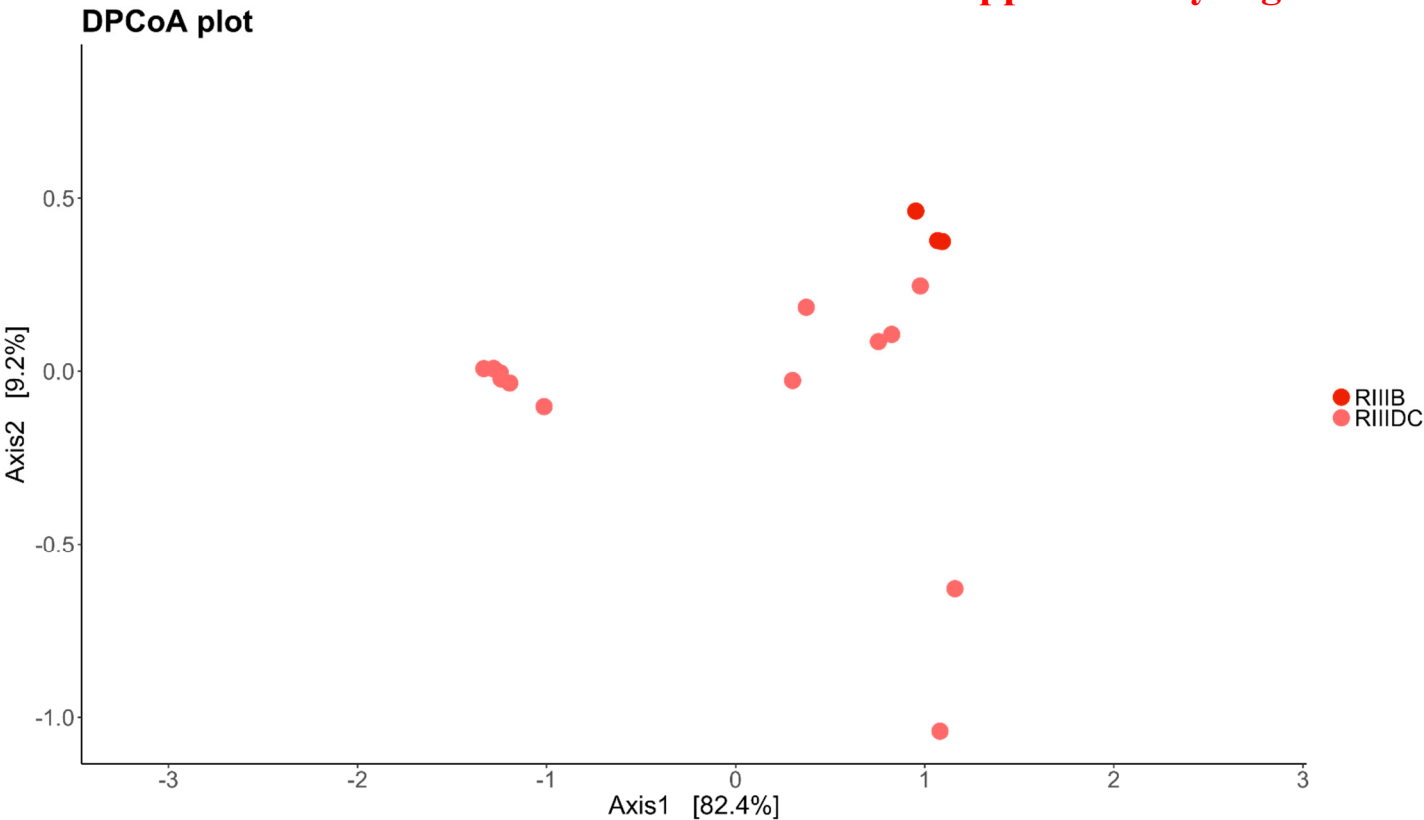

Supplementary Figure 3E

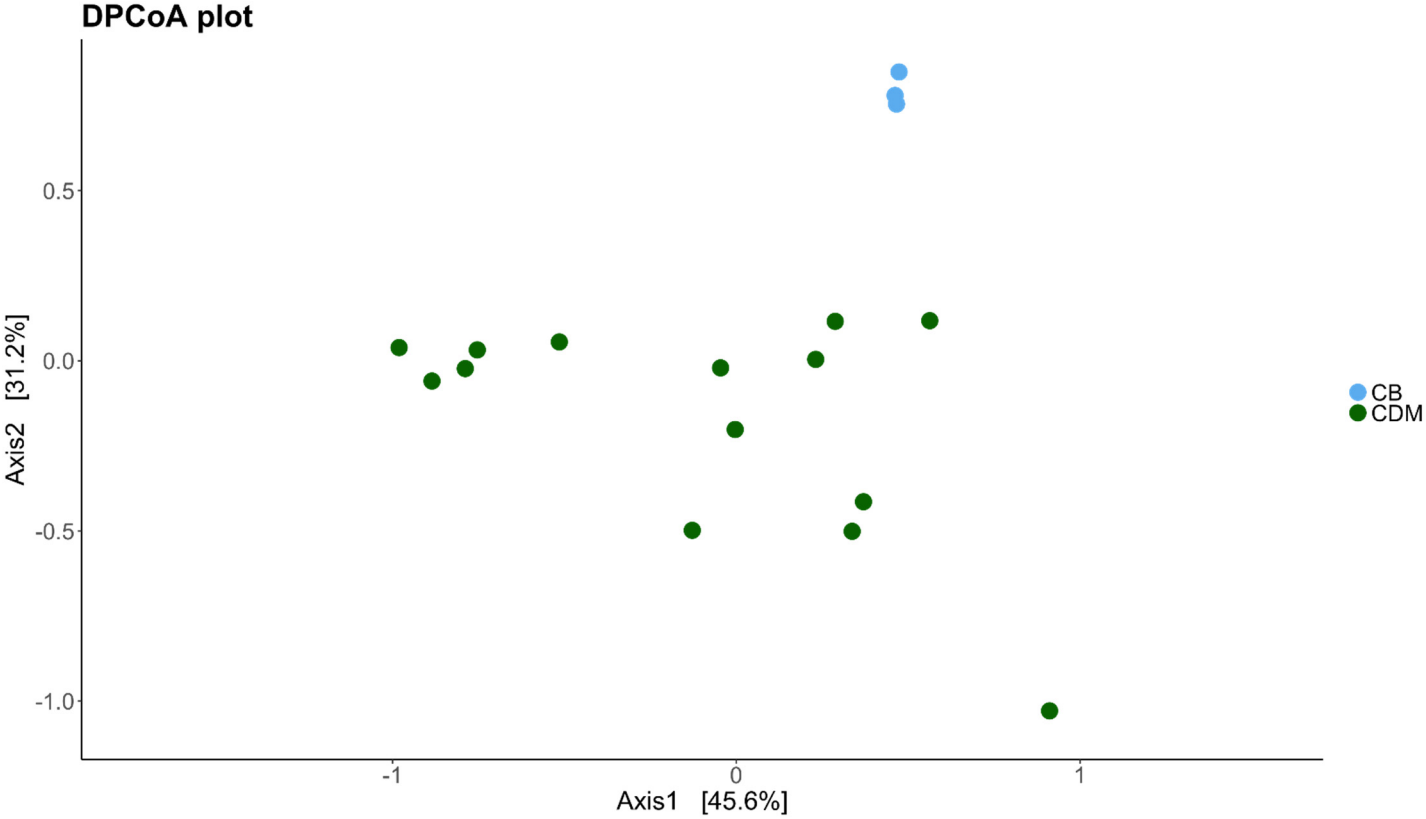

Supplementary Figure 3F

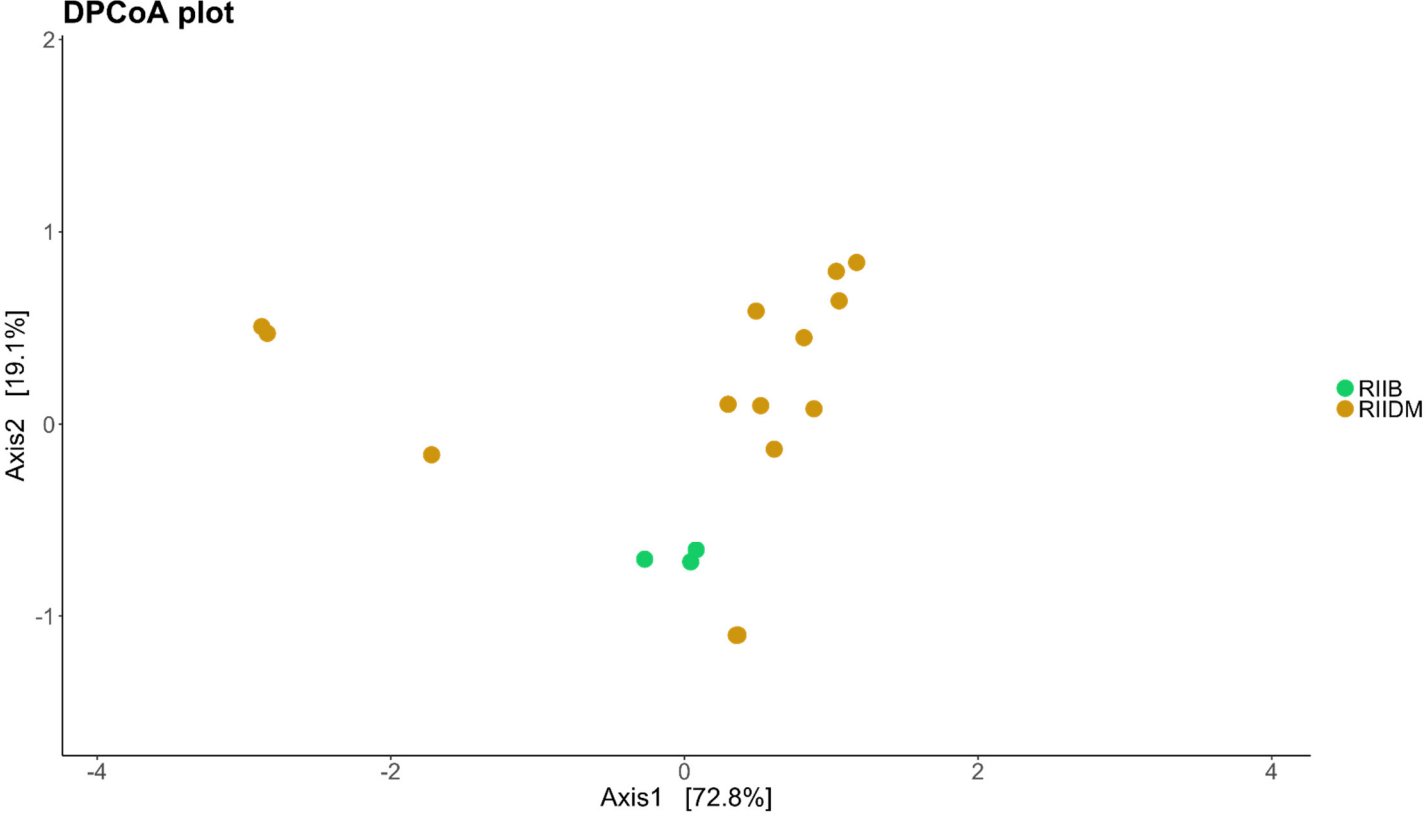

Supplementary Figure 3G

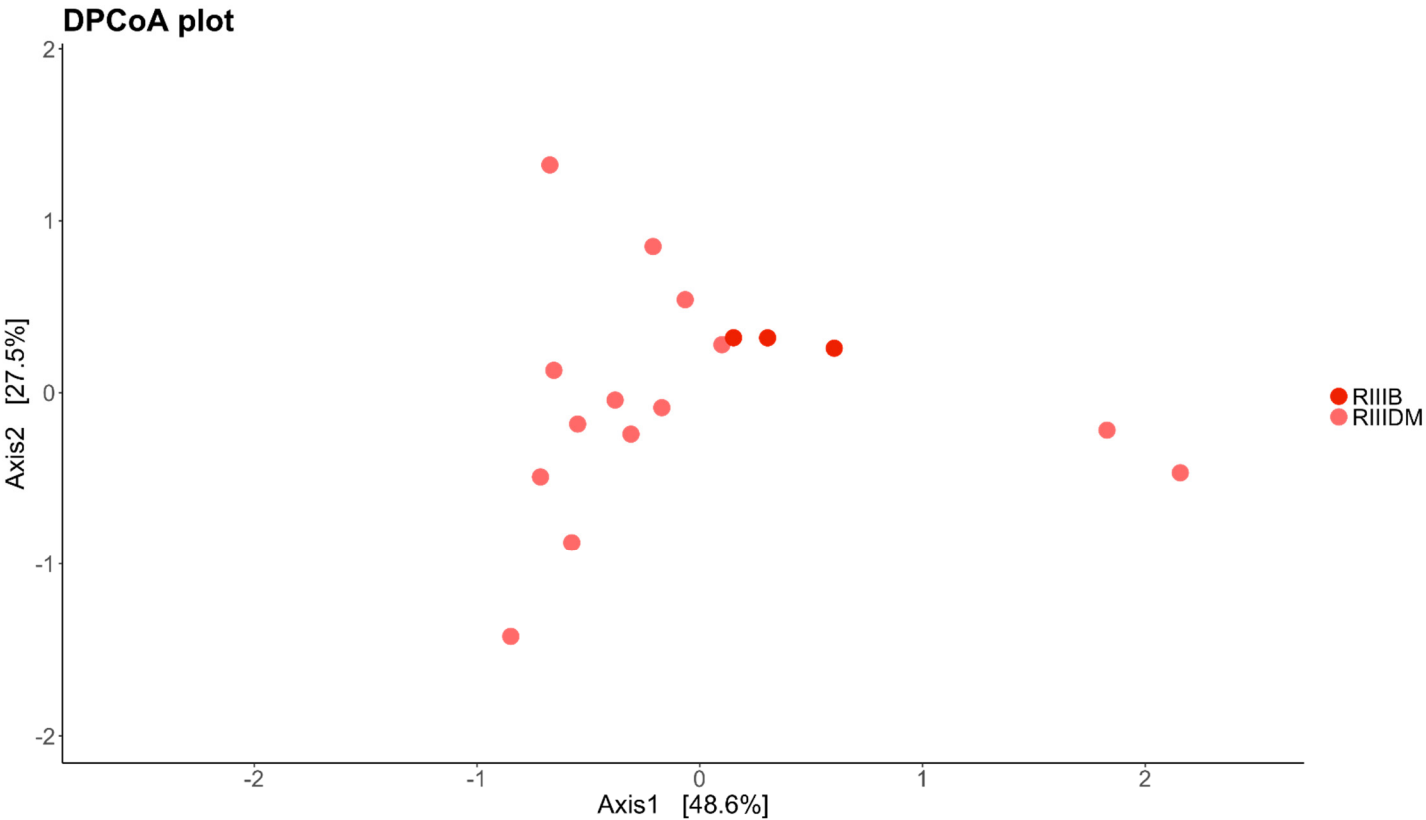

Supplementary Figure 4A

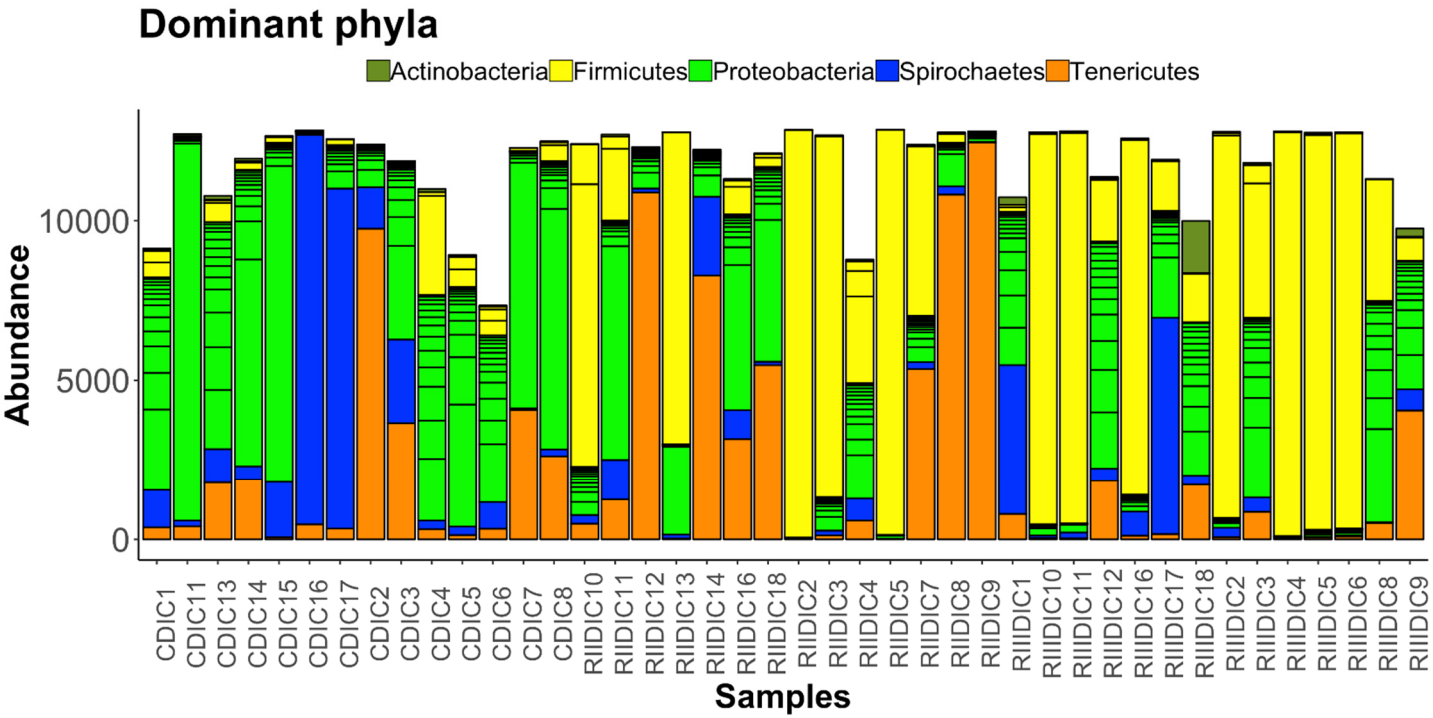

Supplementary Figure 4B

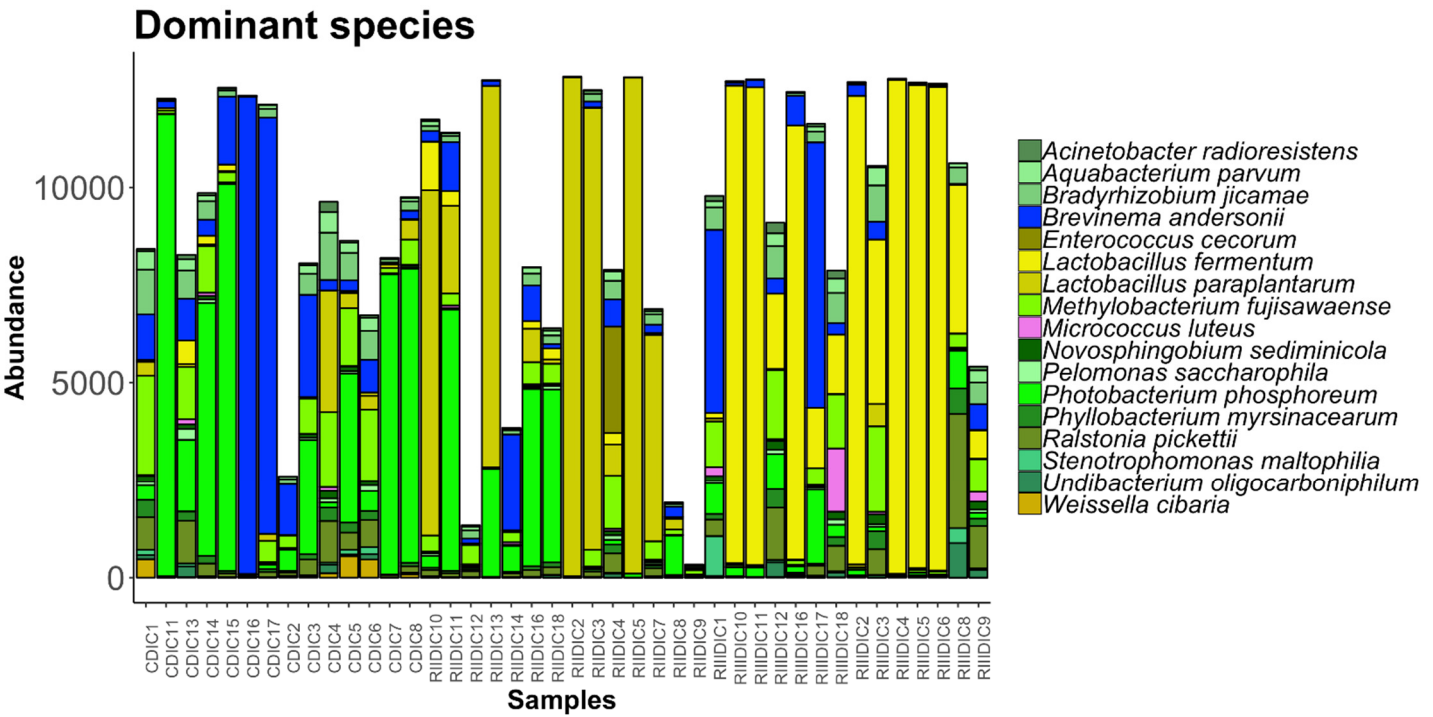

Supplementary Figure 4C

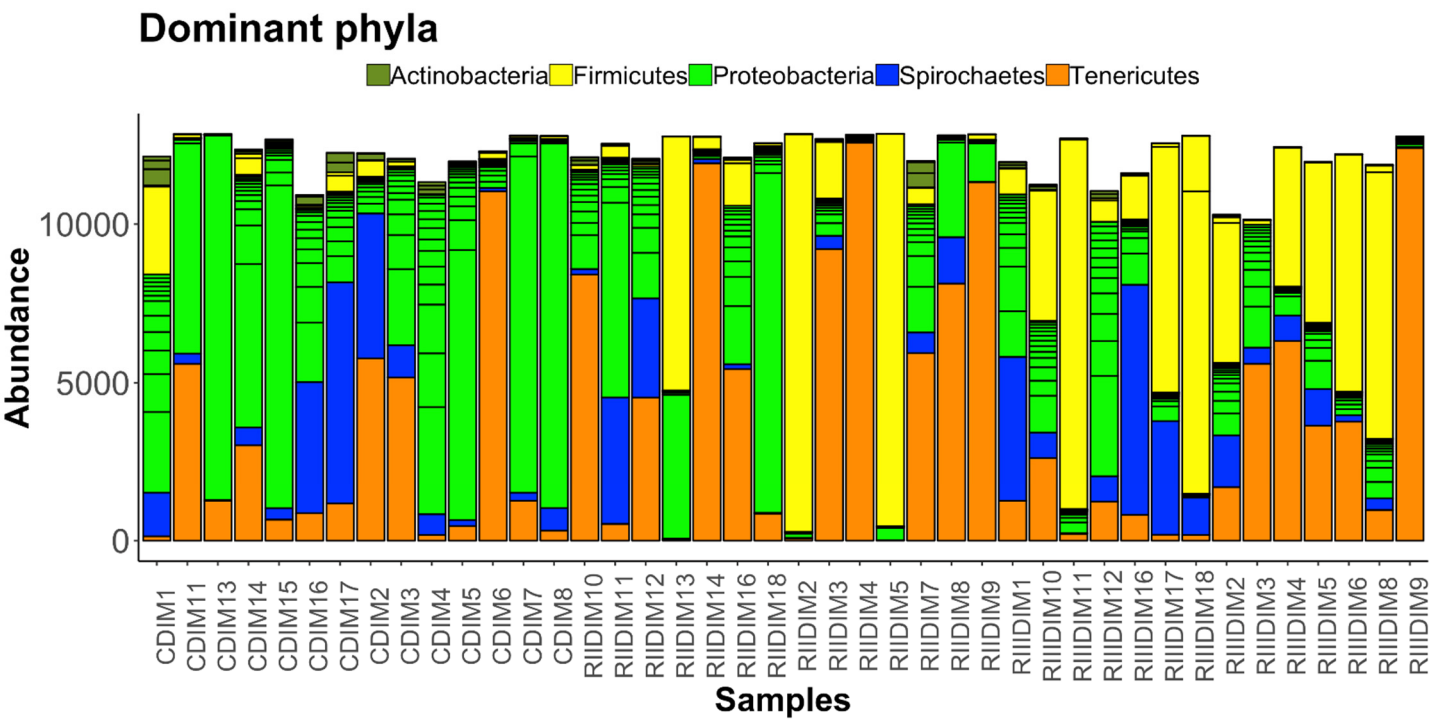

Supplementary Figure 4D

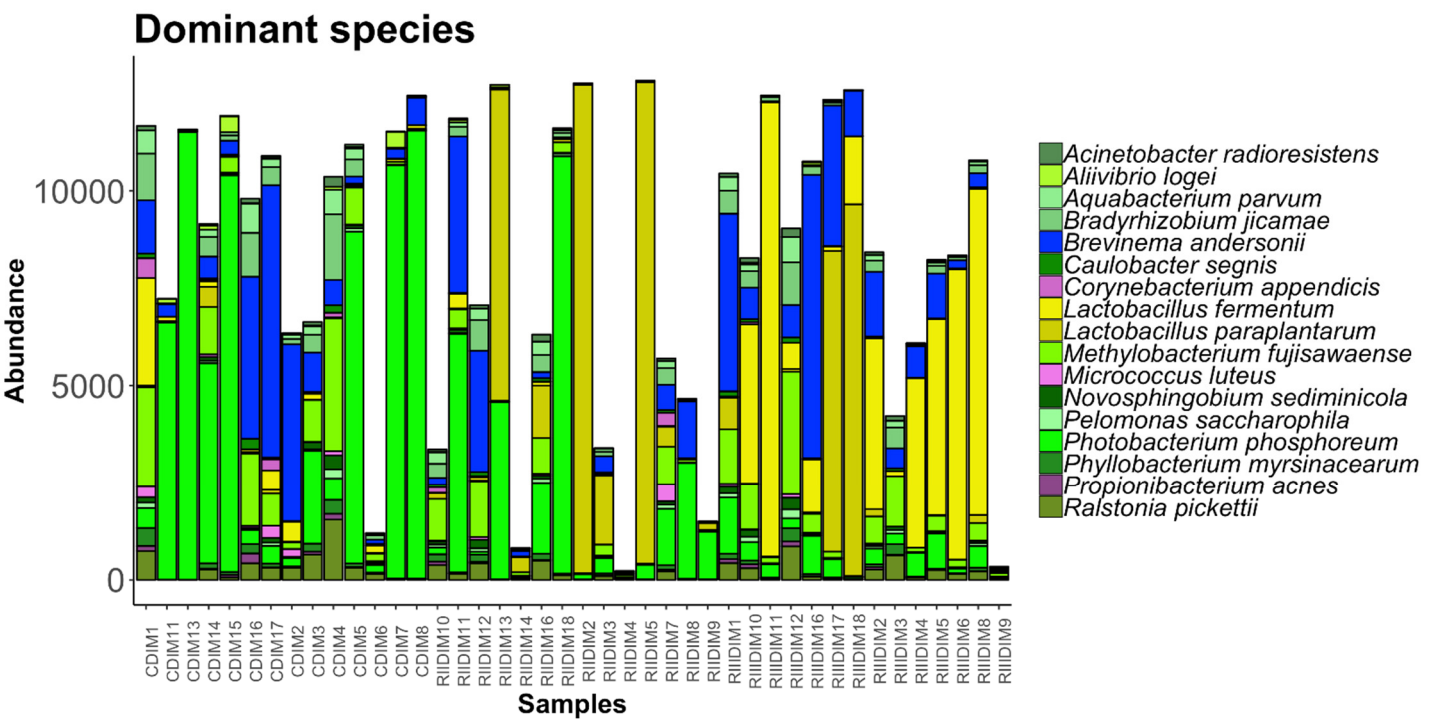

## Supplementary Figure 5A

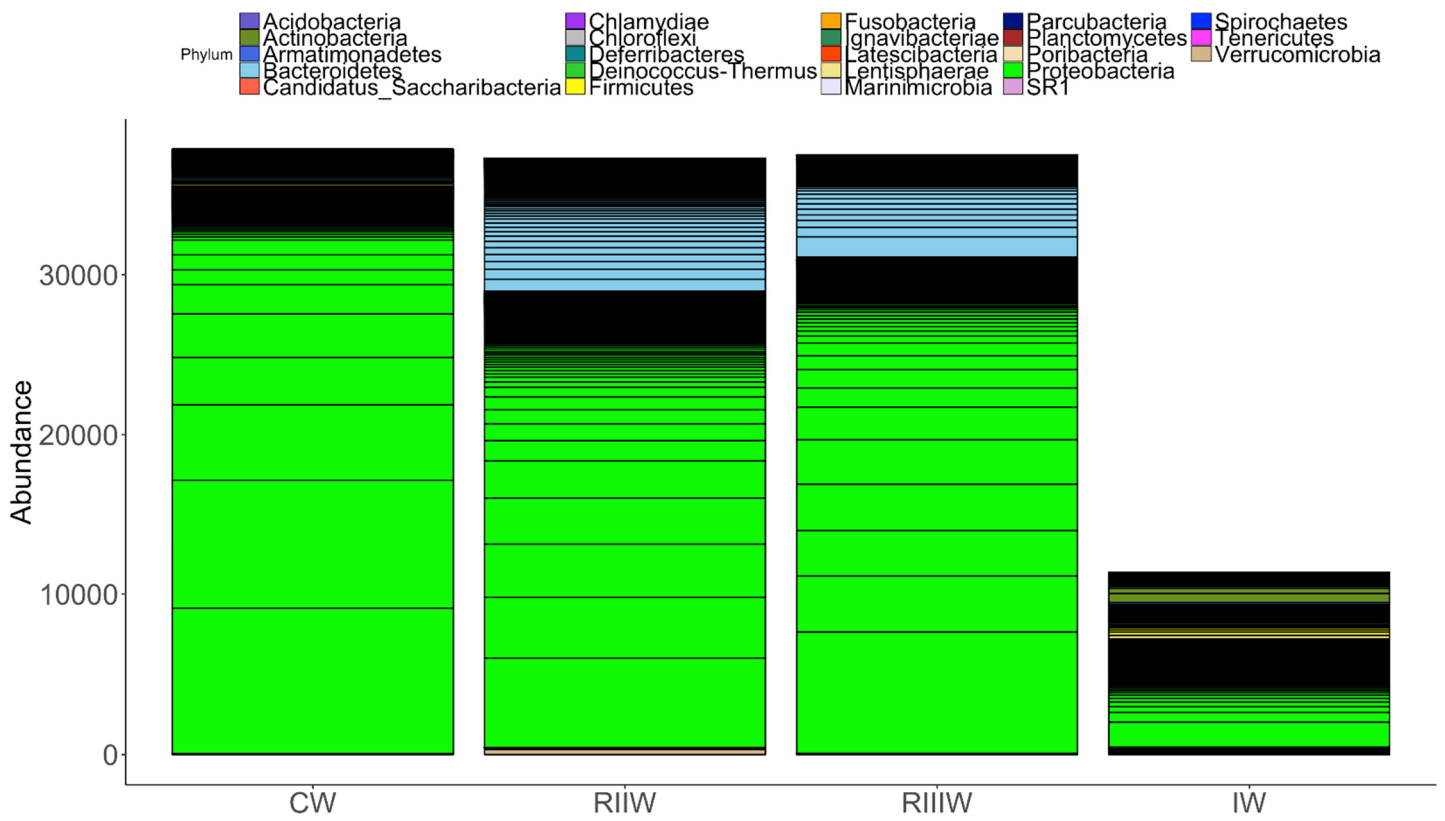

## Supplementary Figure 5B

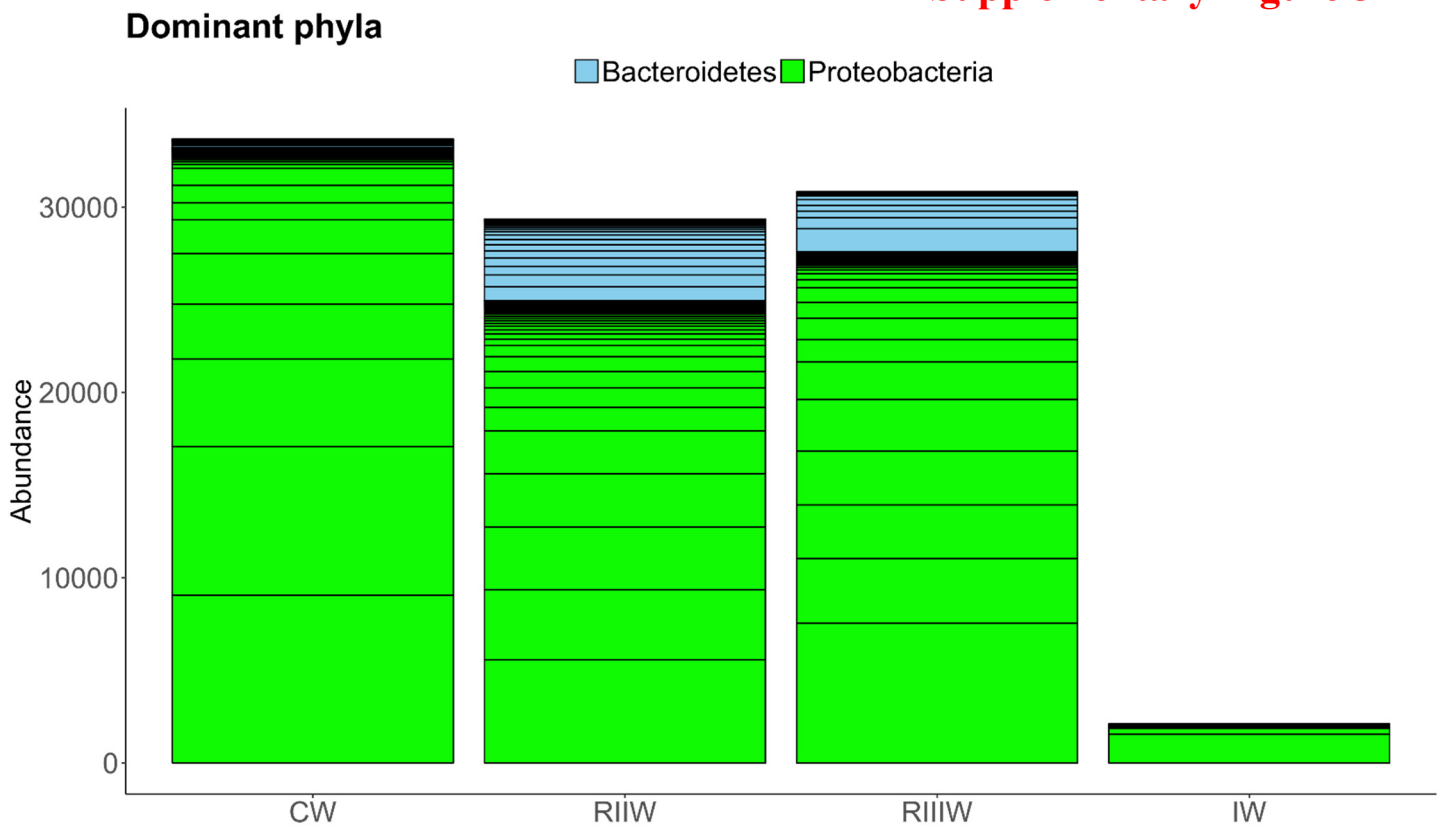



Supplementary Figure 6A

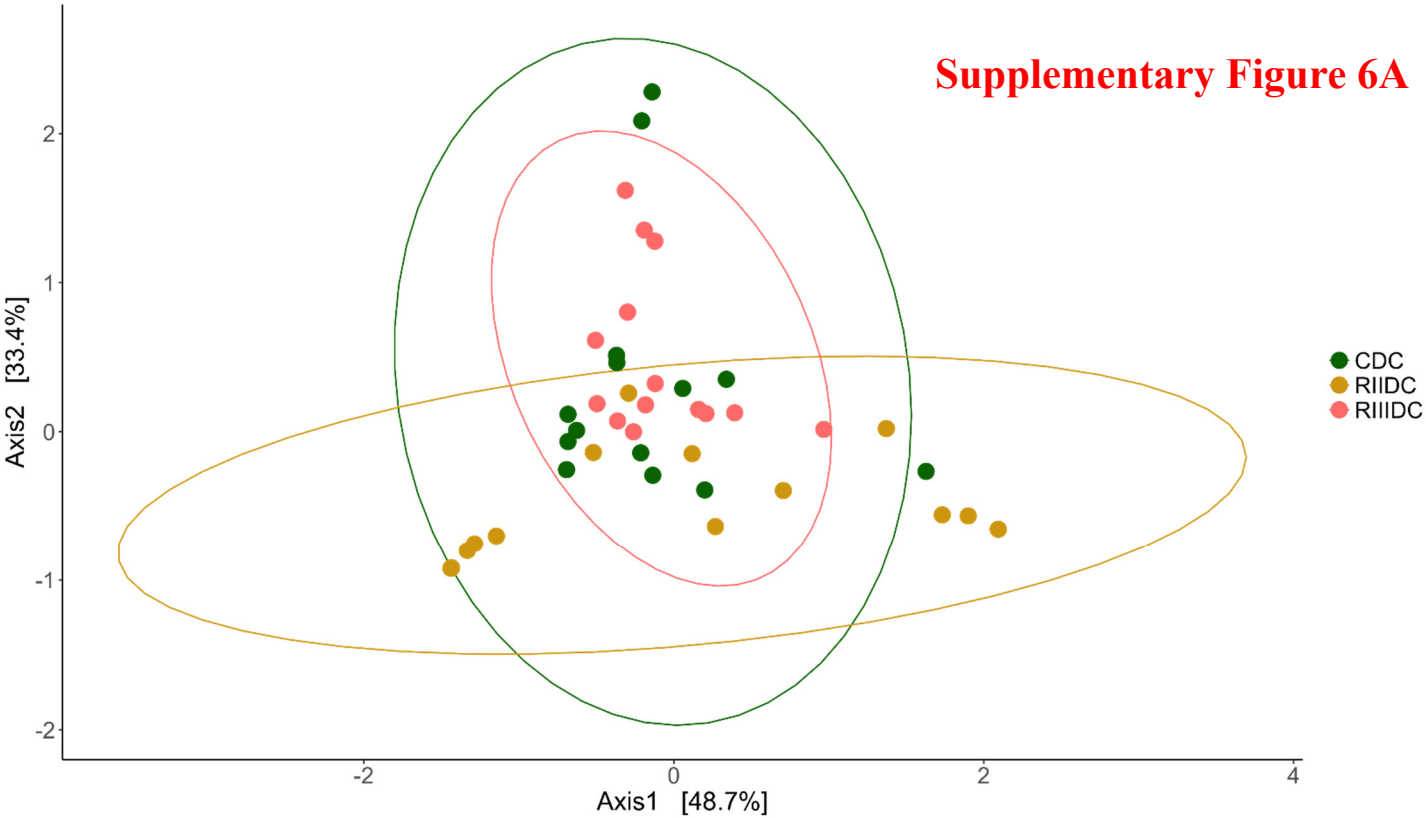

Supplementary Figure 6B

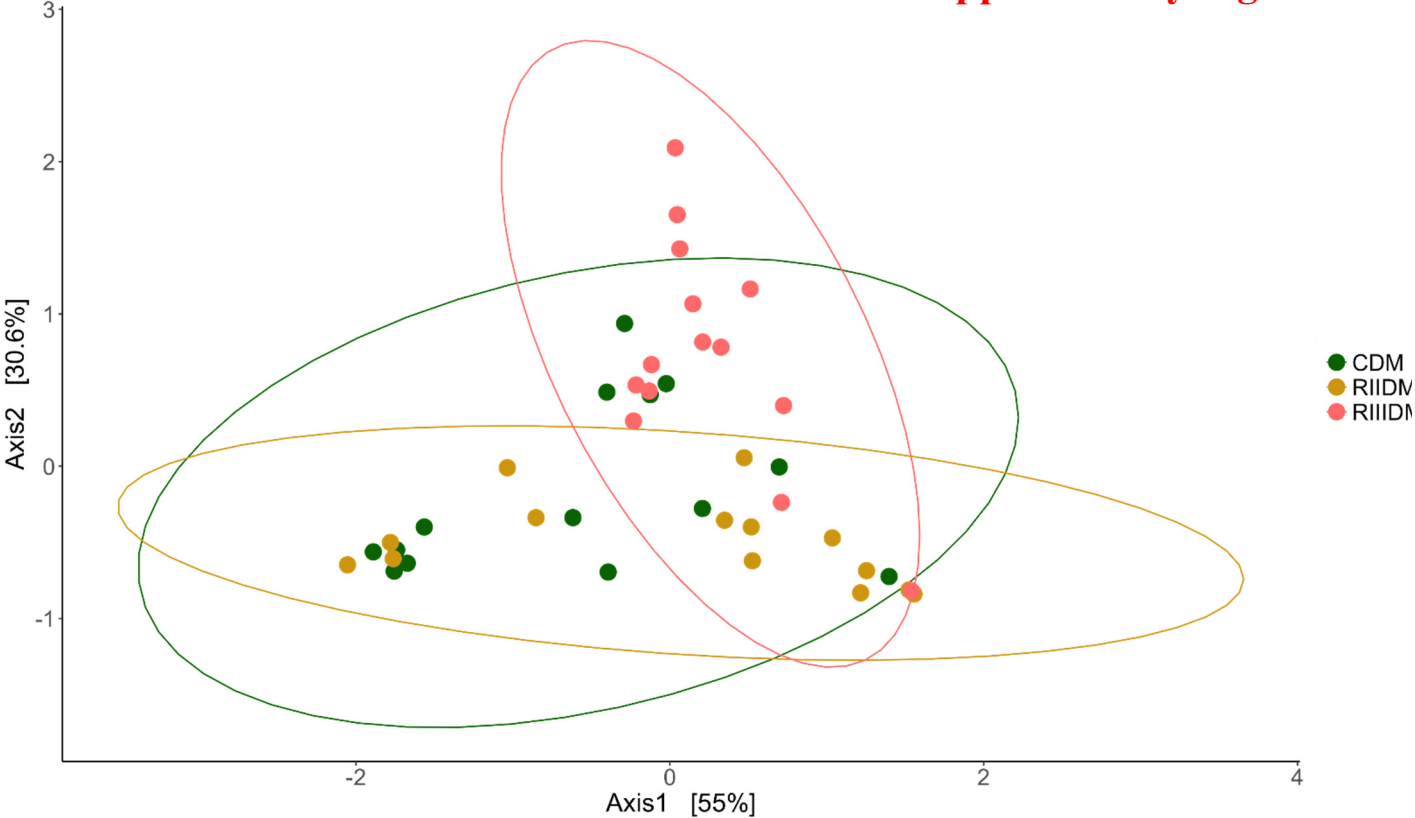

Supplementary Figure 7

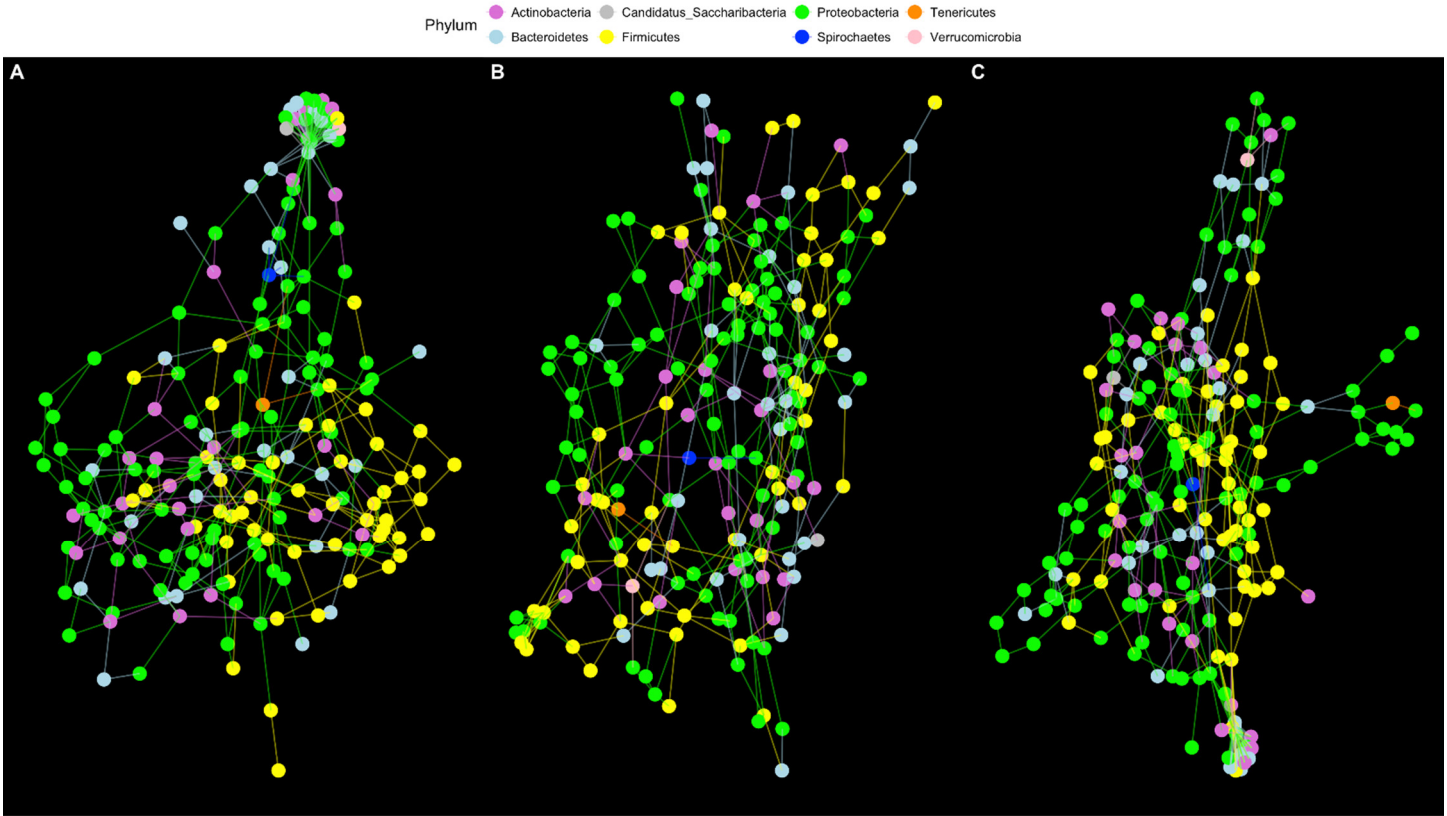

Supplementary Figure 8

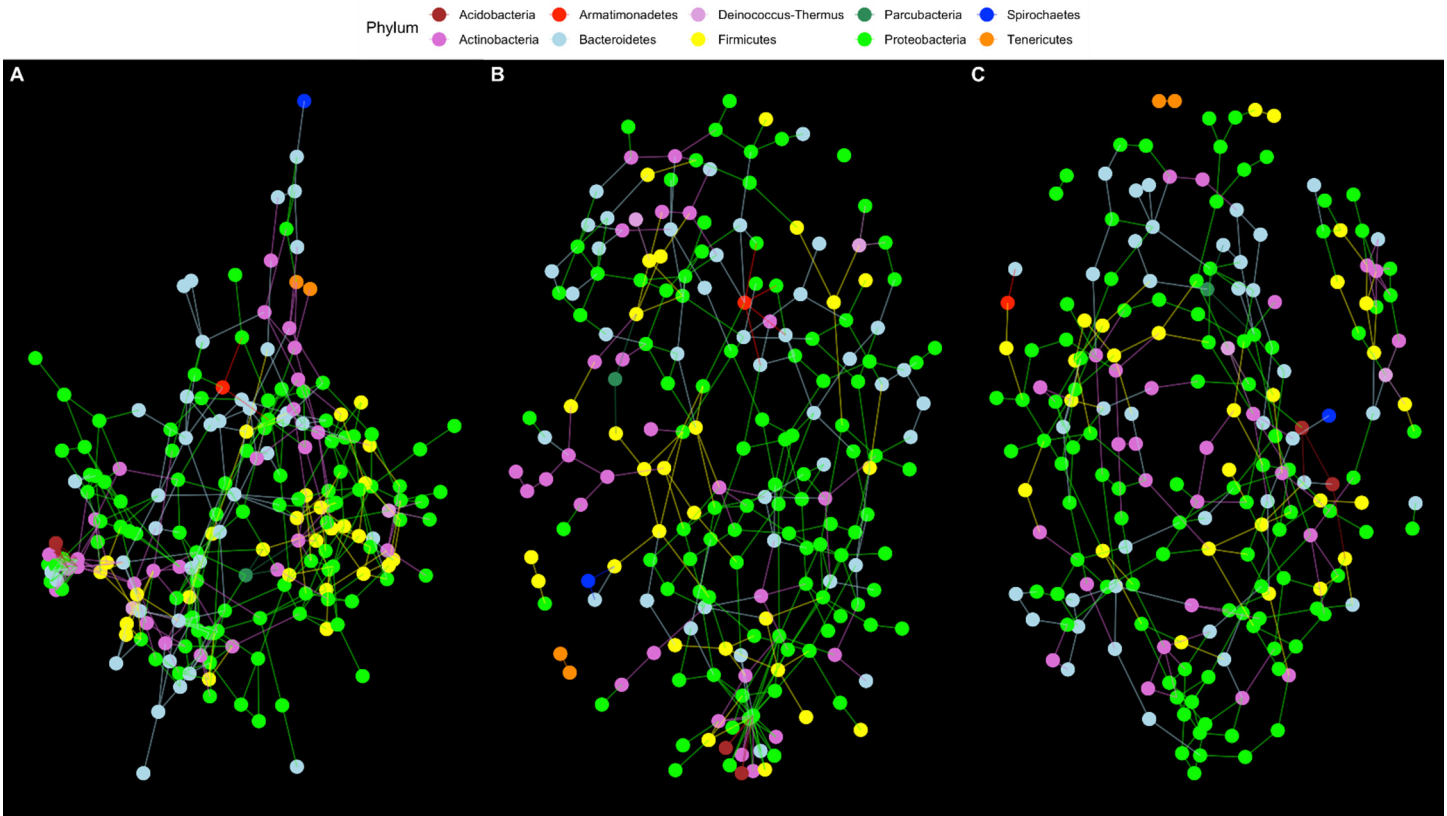

## Supplementary Figure 9A

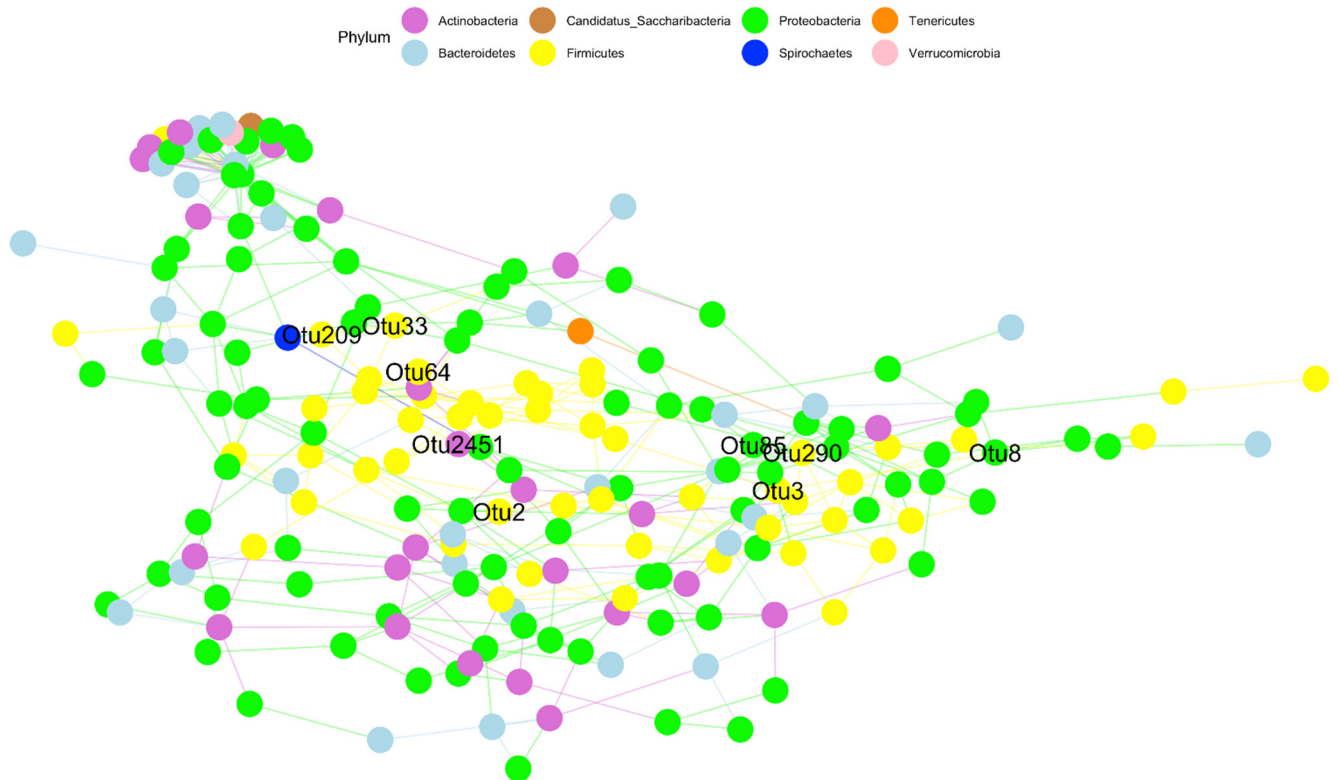

## Supplementary Figure 9B

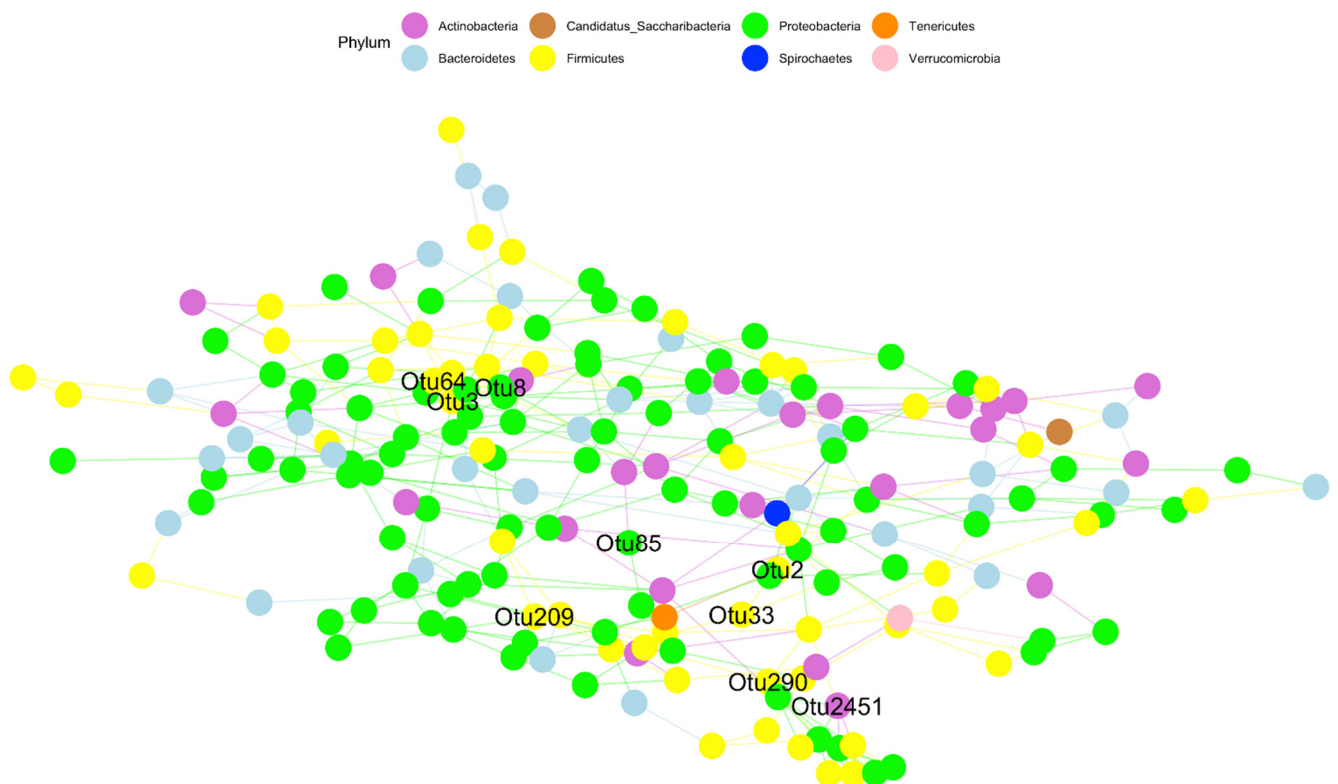

Supplementary Figure 9C

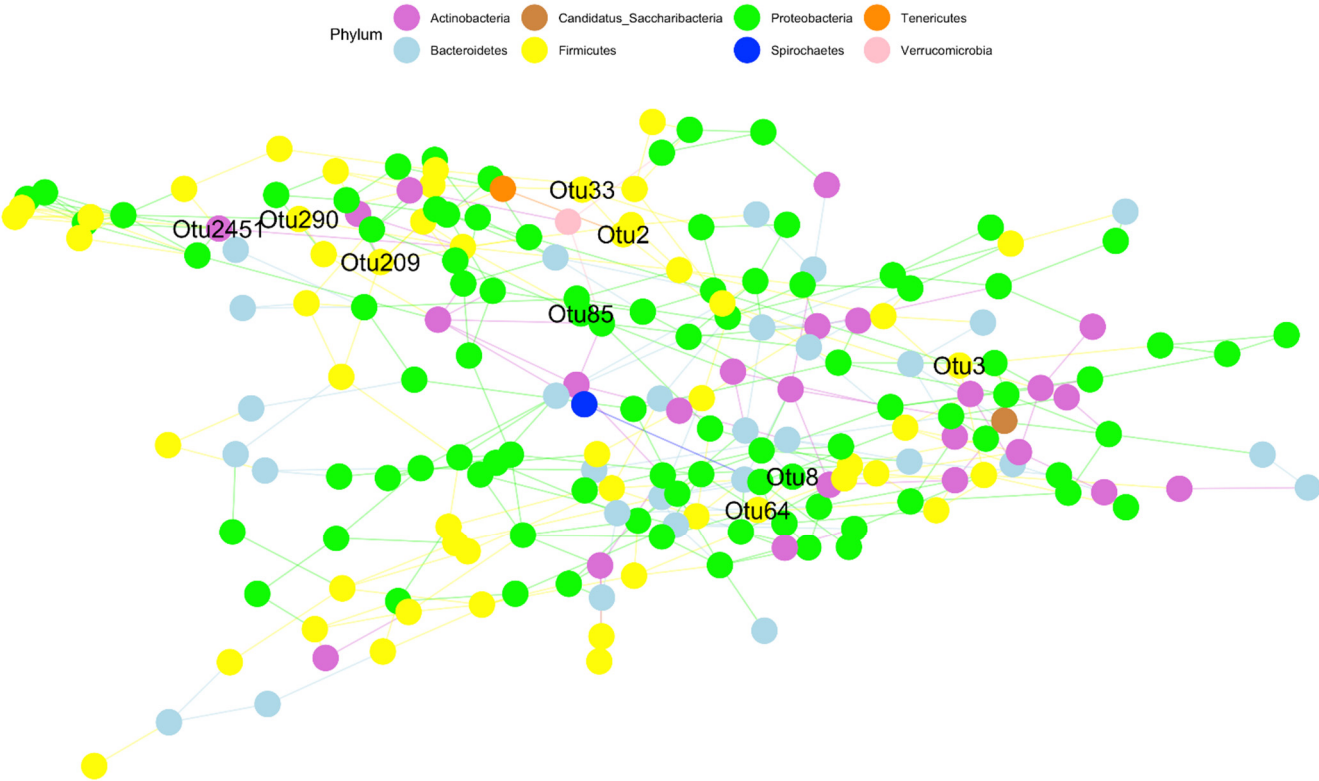



Supplementary Figure 10A

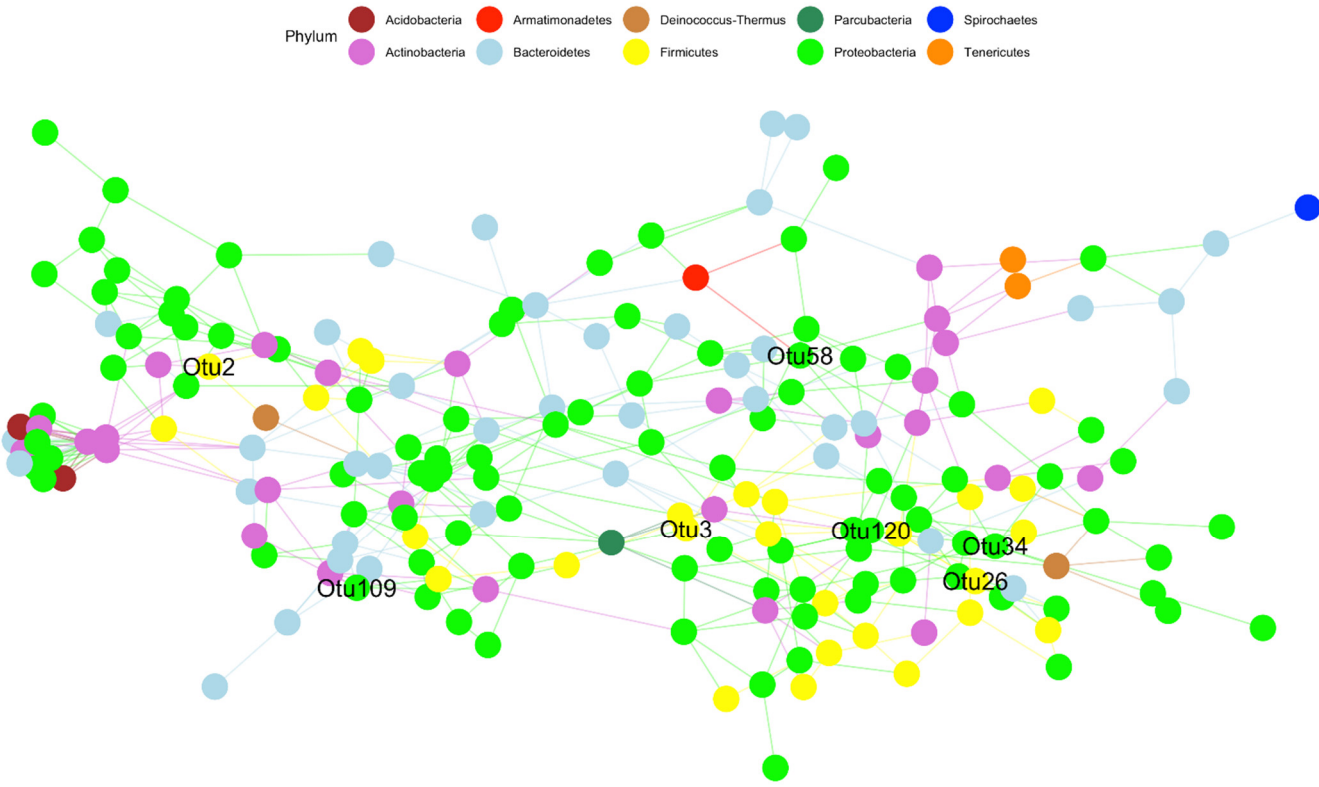

Supplementary Figure 10B

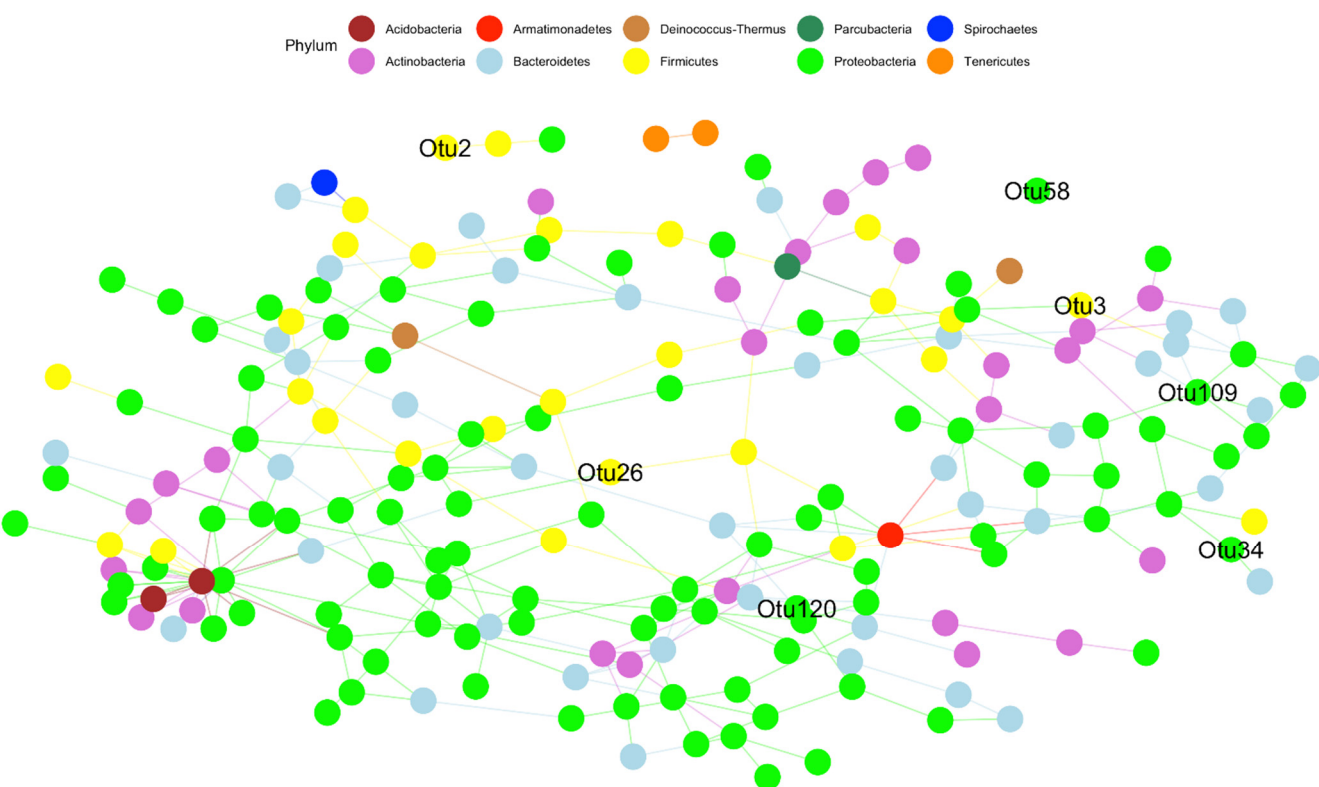

## Supplementary Figure 10C

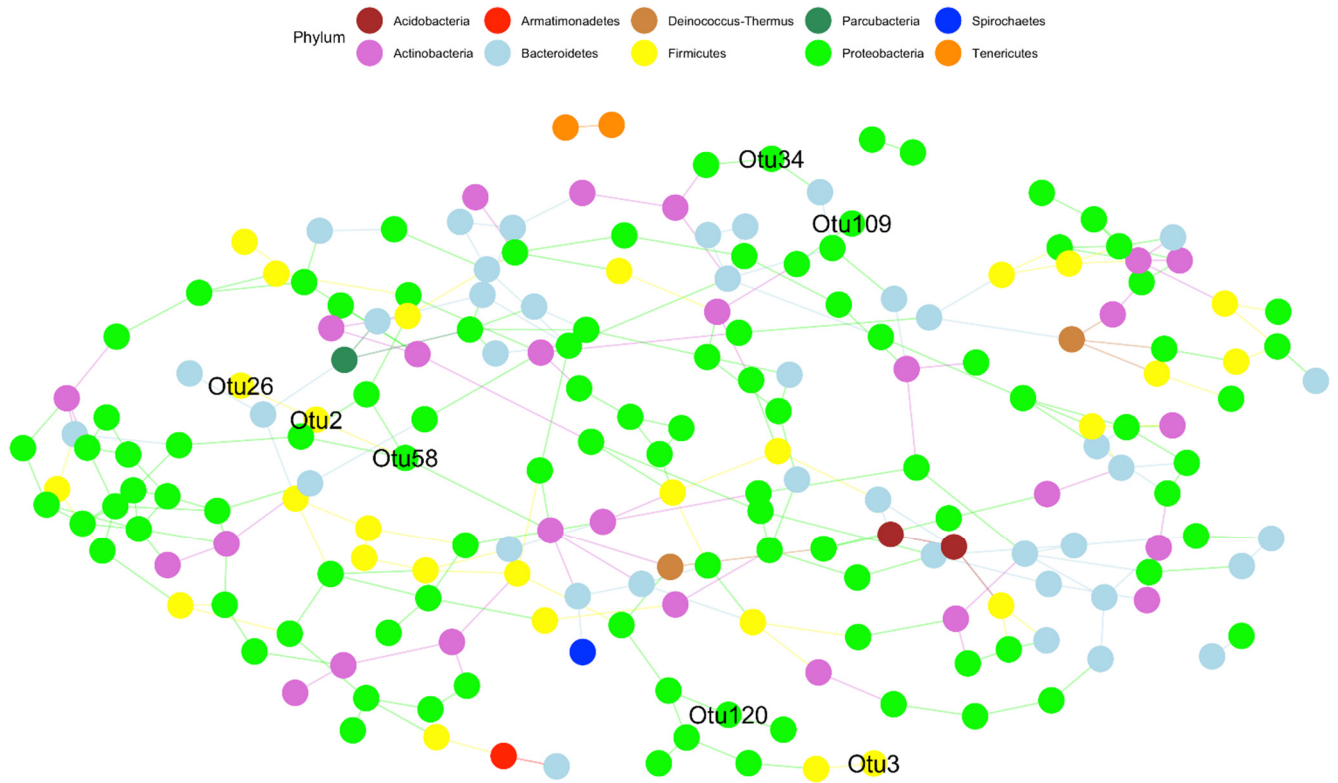

**Supplementary Figure 11A**

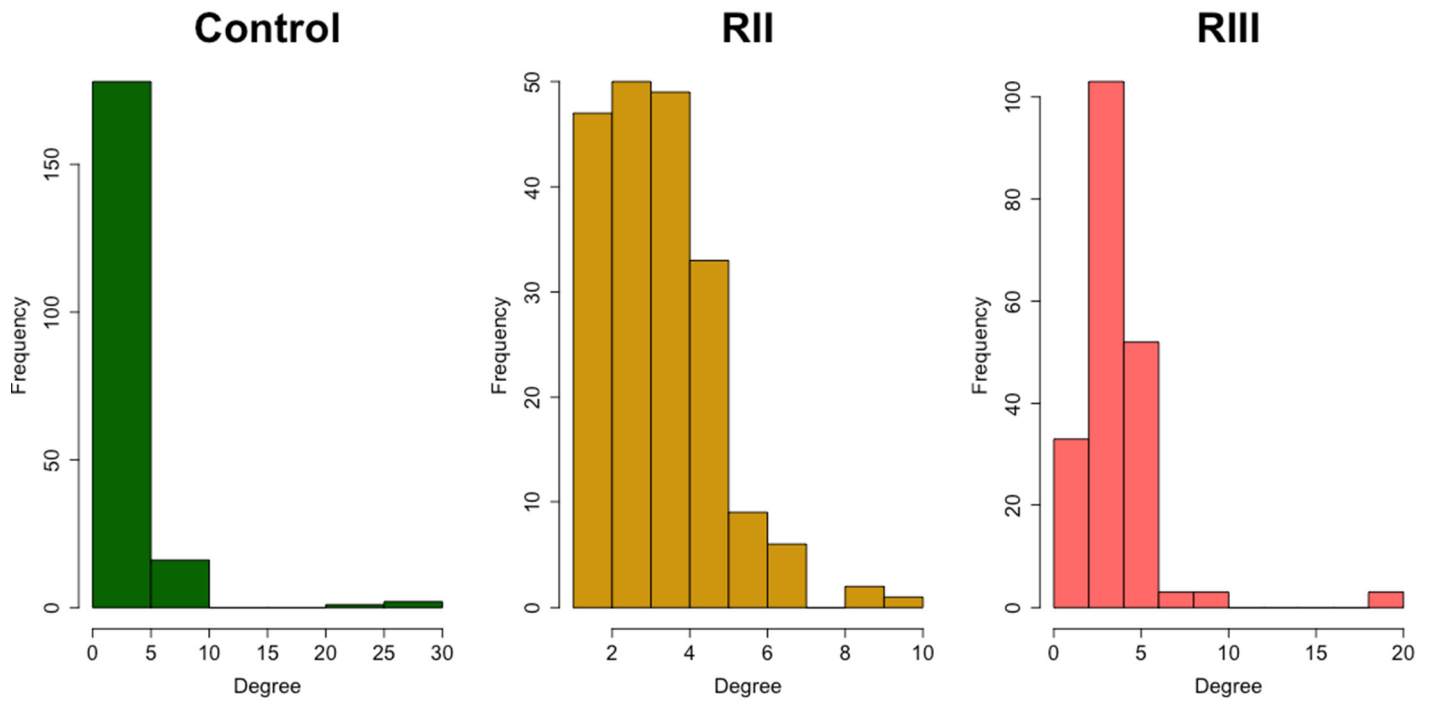

**Supplementary Figure 11B**

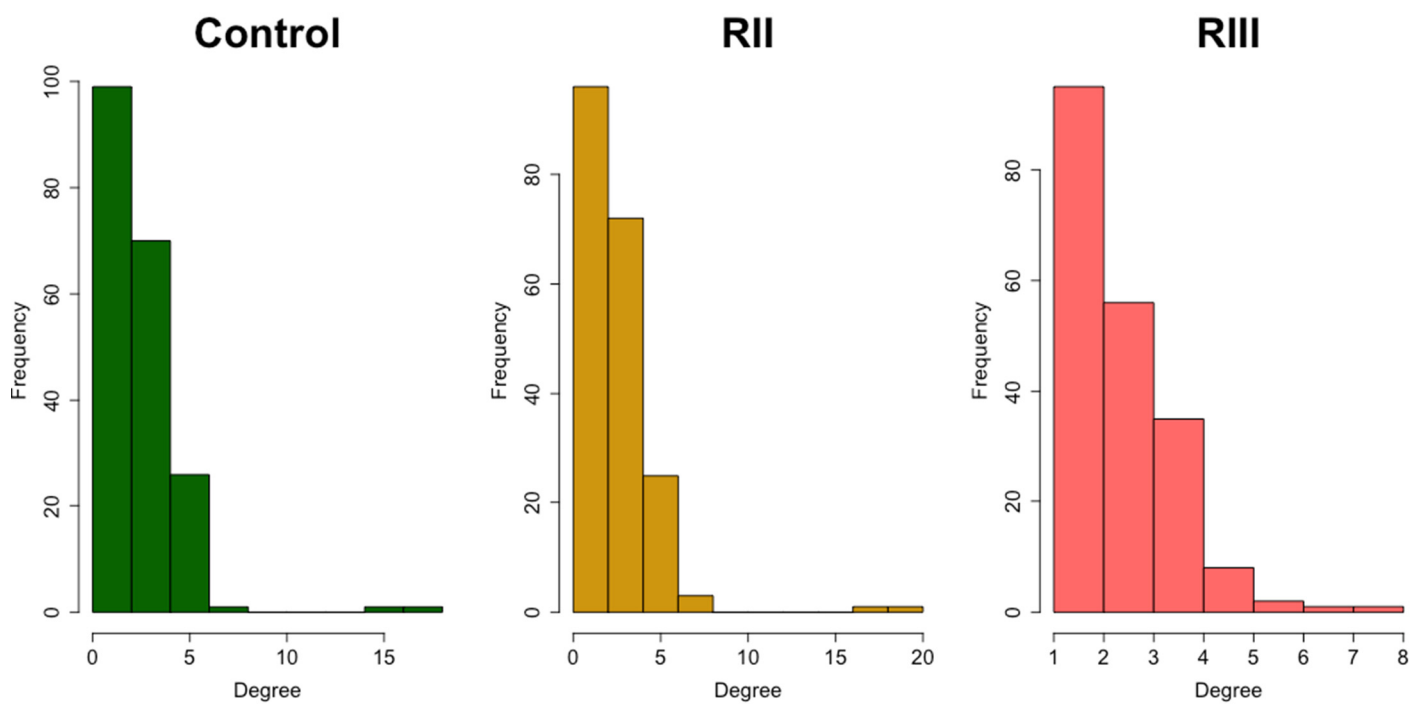

Supplement: Supplementary file [file 14101661]
